1 **Mueller et al.:** GIS mapping mosquito control hurricane

Stephanie Richards  
Environmental Health Sciences  
Program,  
Department of Health Education and  
Promotion, College of Health and  
Human Performance, East Carolina  
University, 3403 Carol Belk Building  
Greenville, NC 27858  
Tel. No.: 252-328-2526  
E-mail: richardss@ecu.edu

2  
3  
4 Journal of Medical Entomology  
5 Modeling, GIS, Risk Assessment, Economic Impact

6  
7  
8  
9  
10  
11  
12  
13  
14

15

16

17 **Geographic Information System Protocol for Mapping Areas Targeted for**

18 **Mosquito Control in North Carolina**

19

20

21 Andrew Mueller<sup>1</sup>, Anthony Thomas<sup>1</sup>, Jeff Brown<sup>2</sup>, Abram Young<sup>2</sup>, Kim Smith<sup>3</sup>, Roxanne  
22 Connelly<sup>4</sup>, and Stephanie L. Richards<sup>5,6</sup>

23

24 <sup>1</sup>Brunswick County Geographic Information Systems, 30 Government Center Dr.,  
25 Bolivia, NC

26 <sup>2</sup>Brunswick County Mosquito Control, 179 March 9, 1764, Bolivia, NC

27 <sup>3</sup>Columbus County Health Department, Whiteville, NC

28 <sup>4</sup>Centers for Disease Control and Prevention, Division of Vector-borne Diseases,  
29 Arboviral Diseases Branch, Fort Collins, CO

30 <sup>5</sup>Environmental Health Sciences Program, Department of Health Education and  
31 Promotion, College of Health and Human Performance, East Carolina University,  
32 Greenville, NC;

33

34 <sup>6</sup>Corresponding author email: richardss@ecu.edu; Office: 1-252-328-2526

35

36

37  
38  
39  
40  
41  
42  
43  
44  
45  
46  
47  
48  
49  
50  
51  
52

## ABSTRACT

Geographic information systems (GIS) can be used to map mosquito larval and adult habitats and human populations at risk for mosquito exposure and possible arbovirus transmission. GIS can help simplify and target mosquito control efforts during routine surveillance and post-disaster (e.g., hurricane-related flooding) to protect emergency workers and public health. A practical method for prioritizing areas for emergency mosquito control has been developed and is described here. North Carolina (NC) One Map was used to identify state-level data layers of interest based on human population distribution and mosquito habitat in Brunswick, Columbus, Onslow, and Robeson Counties in eastern NC. Relevant data layers were included to create mosquito control treatment areas for targeted control and an 18-step protocol for map development is discussed. This protocol is expected to help state, territorial, tribal, and/or local public health officials and associated mosquito control programs efficiently create treatment area maps to improve strategic planning in advance of a disaster. This protocol may be applied to any NC county and beyond, thereby increasing local disaster preparedness.

**Keywords:** geographic information science, emergency mosquito control, hurricane

53  
54  
55  
56  
57  
58  
59

## INTRODUCTION

Strategic planning prior to a natural disaster, such as a hurricane, is essential for counties to prepare for mosquito issues that will inevitably arise as flood waters recede [1-5]. In North Carolina (NC), agencies such as the NC Department of Public Safety, Division of Emergency Management and NC Department of Health and Human Services (NC DHHS) [Division of Public Health (DPH)], along with others, work together

60 to develop communication and contingency plans for post-hurricane activities related to  
61 mosquito control.

62       Geographic information systems (GIS) are valuable tools that can be used for  
63 many purposes, i.e., from straightforward mapping/tracking of mosquito habitats near  
64 human populations that could be potential treatment areas to spatiotemporal analyses  
65 modeling predictions of disease risk [6-9]. Mapping can also be used for determining  
66 placement of sentinel chickens used in surveillance for some arboviruses [10]. Ideally,  
67 maps of treatment areas would be created and available pre-disaster to ensure the  
68 most streamlined ground or aerial response. This planning step will save organizations  
69 time and reduce stress on employees and management during the disaster event and  
70 maps can also be used during non-disaster periods. Map layers can help identify areas  
71 to help mosquito control operators develop surveillance and treatment plans, including  
72 flight patterns [11] and supporting ground operations. Layers within the GIS can also  
73 show other types of data such as larvicide/adulticide applications, areas where  
74 insecticide resistance has been detected, disease cases, as well as mosquito landing  
75 and trap counts pre- and post-treatment for reporting/analysis. Protected areas (e.g.,  
76 NC Heritage Program [NCHP], United States Fish and Wildlife Service [USFWS], major  
77 water bodies [streams, rivers], federal land [e.g., nature preserve, conservation  
78 easement]) where treatments should be avoided can also be shown.

79       Organizations dealing with emergency response and local/state mosquito control  
80 programs (MCPs) can use baseline mapping information to develop a customized  
81 response for their respective communities. Baseline maps provide an important  
82 planning foundation, especially for communities with no mosquito control experience.

83 Government administrators can use the information to estimate costs and readiness for  
84 justification of services through the Federal Emergency Management Agency (FEMA)  
85 application process post-disaster (i.e., mosquito habitat identification, protected areas of  
86 restricted insecticide application). GIS can help MCPs plan locations for larval  
87 surveillance, mosquito landing counts, and trapping pre- and post-insecticide  
88 application. This will aid MCPs in providing recommendations to local health directors,  
89 as well as help with press releases and communication with public information officers.  
90 Pre-planning and active communication between agencies involved in emergency  
91 response ensures that local management personnel have knowledge of the mosquito  
92 response plan in advance of a disaster [3,6,12].

93 Hurricanes and flooding can increase the potential for mosquito-human contact  
94 and incidence of mosquito-borne disease [6,12]; however, this relationship is complex  
95 [13]. A federal declaration of a disaster or emergency renders state/local agencies  
96 eligible for disaster-related reimbursement [14]. FEMA works with CDC to determine  
97 the extent of mosquito-borne disease risk. GIS can be a valuable tool for health  
98 directors who (in NC) are the deciding authority on emergency mosquito control  
99 response regarding reimbursement rules by FEMA [15]. It would be a good practice to  
100 consult local municipalities on whether they would like to be included on an emergency  
101 mosquito control response at the county level [3].

102 Naled is an organophosphate insecticide active ingredient commonly used in  
103 aerial application for mosquito control [16]. In 2018, in response to the aftermath of  
104 Hurricane Florence in NC, VDCI conducted aerial mosquito control treatments using  
105 naled in four counties (Brunswick, Carteret, Harnett, Johnston) encompassing 919,272

106 acres [11]. Despite *ca.* \$3.5 billion of state and federal funding spent on recovery efforts  
107 from Hurricanes Matthew (2016) and Florence (2018) [17], there was a lack of  
108 preparedness (e.g., lack of updated maps, communication issues) of many eastern NC  
109 counties after Hurricane Florence. This lead to the development of a statewide mosquito  
110 control services contract (duration of current contract: August 23, 2021-August 24,  
111 2024) with a private vendor who would help manage emergency mosquito control  
112 ([https://files.nc.gov/ncdps/documents/files/NCDPS-MAC-Fact-Sheet-Oct-20-2021-  
113 v1.pdf](https://files.nc.gov/ncdps/documents/files/NCDPS-MAC-Fact-Sheet-Oct-20-2021-v1.pdf)) through the NC Department of Public Safety, Emergency Management. In 2021,  
114 NC created a Mosquito Management Task Force composed of personnel from NC  
115 Department of Public Safety, NC DHHS [DPH], county mosquito control, and  
116 representatives from the non-profit NC Mosquito and Vector Control Association to  
117 assist with the strategic planning and implementation process of an emergency  
118 mosquito control response. Currently, no known published studies have described the  
119 stepwise process for identifying and mapping mosquito control treatment areas and this  
120 could be used for normal and/or emergency planning.

121         Consequently, the objective here was to develop a straightforward GIS protocol  
122 for mapping possible areas to direct aerial and/or ground insecticide treatments for  
123 mosquito control post-hurricane. This protocol provides a baseline foundation for  
124 organizations that will improve preparedness and reduce stress during the post-disaster  
125 period. Ideally, the creation of maps could be standardized and used by any county  
126 across NC or other areas using an autonomous analysis (i.e., model builder, Python  
127 script), adaptive layers (e.g., population distribution/density), national datasets (e.g.,

128 wetlands, flood plains), heritage data (e.g., managed/restricted areas), water bodies,  
129 and other layers using state-level data.

## 130 **MATERIALS AND METHODS**

### 131 **Development of Geographic Information System**

132 NC One Map (<https://www.nconemap.gov/>) was used to identify state-level data  
133 layers of interest based on population distribution and mosquito habitat in Brunswick,  
134 Columbus, Onslow, and Robeson Counties in eastern NC. A Python script was  
135 integrated into the model and customized to the needs of MCPs. Data layers of interest  
136 included: human population density that was local address point data originating from  
137 the local authority/county/municipality in conjunction with block-level population data  
138 from the US Census Bureau [18-20], wetlands [21], county boundaries, protected areas  
139 (i.e., NCHP data from USFWS, major water bodies [streams, rivers] [22-23], and federal  
140 land [e.g., nature preserve, conservation easement]). A municipal data layer was also  
141 added so health directors could do a local evaluation of the treatment zone maps prior  
142 to deciding the extent of emergency mosquito control measures.

### 143 **United States Fish and Wildlife Service Review**

144 The USFWS must review proposed mosquito control treatment areas for  
145 presence of endangered species prior to treatment. This federal agency may  
146 recommend changes based on knowledge of endangered species in the area that may  
147 be impacted by insecticide application, based on organism biology. Although this review  
148 is required, the maps provided here have not yet undergone final review by USFWS.

### 149 **Mapping Mosquito Control Treatment Zones**

150 A 1 mi<sup>2</sup> index grid was developed to demonstrate incidence of address points  
151 (built structures) and delineate areas to be treated. The grid is the foundational  
152 component for developing treatment zones and is independent from address point data;  
153 however, it can be used to show address density. All known protected areas were  
154 removed from the grid since they were not to be treated. Warning zones (i.e., areas  
155 within 100 ft of protected areas) and mosquito habitats (i.e., wetlands) were identified  
156 and map layers created. In NC, different types of wetlands are known habitats for  
157 mosquito species such as: tidal salt marsh, *Aedes taeniorhynchus*, *Ae. sollicitans*;  
158 bottomland swamp, *Ae. infirmatus*, *Ae. atlanticus*, *Psorophora* spp., *Anopheles*  
159 *crucians*, *An. quadrimaculatus*, *Culex nigripalpus*, *Cx. erraticus*, *Culiseta melanura*,  
160 *Coquilletidia perturbans*, and *Uranotaenia* spp.; Atlantic white cedar wetland forests, *Ae.*  
161 *canadensis*, *Ae. triseriatus*, *Ae. vexans*, *Cx. pipiens/quinqüefasciatus*, *Cx. restuans*, *Cx.*  
162 *territans*, *Cs. melanura* [24]. *Culex pipiens/quinqüefasciatus* and *Cx. restuans* are  
163 vectors of West Nile virus. *Culiseta melanura* is the enzootic vector of Eastern equine  
164 encephalitis virus. Maps were further analyzed by local mosquito control professionals  
165 to identify the suitability of remaining areas within the grid for mosquito control (based  
166 on personal knowledge of the county). Here, the population density layer was edited to  
167 account for vacation homes and other factors that may influence treatment areas in  
168 eastern NC. Address points were used rather than blocks since blocks would not  
169 account for vacation homes.

## 170 **Automated Analysis for Mapping Mosquito Control Treatment Zones**

171 Environmental Systems Research Institute (ESRI; Redlands, CA) ArcMap  
172 software was used to analyze the data to aid local and state officials in determining

173 biologically sensitive, safe, and effective zones for mosquito control application. This  
174 process uses geospatial tools such as: select, merge, clip, buffer, erase, grid index  
175 features, select layer by location, intersect, feature class to feature class, add fields, and  
176 calculate fields.

177 The analysis contains 18 steps to produce a classified fishnet grid of 1 mi<sup>2</sup> cells  
178 indexed around the address point distribution. The classified grid identifies three zones  
179 to be considered by local authorities and MCPs: 1) Approved: Treatable area (mosquito  
180 habitat), 2) Warning: Treatable area (area encompasses protected areas that were  
181 removed/erased from the grid, leaving only treatable areas), and 3) Not significant: Not  
182 treated (areas where people live or structure(s) exist but habitat not ideal for  
183 concentrated mosquito populations).

184 *Step 1.* Select the county to be used in the analysis. The current model can be  
185 used for statewide analysis; however, due to database size including considering  
186 distribution of address points and lengthy processing time, the stepwise example  
187 provided here analyzes a single county. The *select* tool in this step, uses structured  
188 query language (SQL): "County = 'X<sub>0</sub>'" where X<sub>0</sub> is the desired county.

189 *Step 2:* The data layer from the NC NHP must be edited to remove extraneous  
190 data such as logging or industrial information before analysis to help isolate appropriate  
191 areas for mosquito control. The SQL expression [GAP\_STATUS = X<sub>0</sub> Or GAP\_STATUS  
192 = X<sub>1</sub> Or OWNER\_TYPE = X<sub>2</sub>] can be used where X<sub>0</sub> is '1: Managed for biodiversity;  
193 disturbance events proceed or mimicked', X<sub>1</sub> is '2: Managed for biodiversity; disturbance  
194 events suppressed', and X<sub>2</sub> is '3: federal land'.



195            *Steps 3 and 4.* Step 3 adds a 50 ft line *buffer* to each side of the center line of  
196 streams and rivers. Step 4 includes *merging* the polygons for water bodies, buffered  
197 streams and rivers, NHP managed and/or biologically sensitive areas (e.g., endangered  
198 species) (from Step 2).

199            *Steps 5-7.* Step 5 *clips* the merged polygon layer (from Step 4) based on the  
200 county-specific polygon (from Step 1). The clip tool works as a cookie cutter, trimming  
201 layers outside its boundary lines. Step 6 adds a 100 ft line buffer to the merged layer  
202 (from Step 5) and creates a single feature. This buffer helps minimize insecticide  
203 droplets that could drift into biologically sensitive areas by extending the distance  
204 between the release of the insecticide and the sensitive area. Step 7 clips the statewide  
205 wetland layer to the county boundary.

206            *Steps 8-9.* Step 8 uses the *grid index features* with cells set to 1 mi<sup>2</sup> to generate  
207 a fishnet style grid indexed to the address point layer. Step 9 uses the *erase* tool to  
208 eliminate cells with biologically sensitive areas (+100 ft buffer). The remaining cells  
209 become the base for the resulting treatment zone.

210            *Steps 10-12.* Step 10 uses the *select by location* tool to select (from the fishnet  
211 grid) cells within 100 ft of the biologically sensitive areas (+100 ft buffer). Step 11  
212 creates a new feature class from the selection using the *feature class to feature class*  
213 tool. Step 12 calculates the newly created Type field classified as “Warning”.

214            *Steps 13-16.* Step 13 involves selecting the fishnet grid by location within 100 ft  
215 of the biologically sensitive areas (+100 ft buffer) and the selection is inverted. In Step  
216 14, a new feature class is created from the inverted selection (i.e., new Type field  
217 classified as “Not Significant”). Step 15 involves selecting cells from the “Not Significant”



241 state and develops a scope of work for cost projection based on vetted acres (i.e., total  
242 cost of application and amount of formulated insecticide product needed for a specific  
243 number of acres).

#### 244 **Mosquito Control Treatment Zone Maps Without Population Density**

245 Figures 1-4 show treatment zones in Brunswick, Columbus, Onslow, and  
246 Robeson Counties created using data layers including wetlands, county boundaries,  
247 protected areas, major water bodies, and federal land. A municipal data layer was also  
248 added so health directors and/or others could do a local evaluation.

249 All counties have areas classified as Approved (green) and Warning (red), but  
250 not Non-Significant (due to extensive wetland areas associated with mosquito habitats).  
251 Brunswick County's Approved (369.90 mi<sup>2</sup>) and Warning (212.12 mi<sup>2</sup>) areas total 582.02  
252 mi<sup>2</sup> classified as areas for treatment consideration (Figure 1). Columbus County's  
253 Approved (640.45 mi<sup>2</sup>) and Warning (66.21 mi<sup>2</sup>) areas total 706.66 mi<sup>2</sup> classified as  
254 areas for treatment consideration (Figure 2). Onslow County's Approved (244 mi<sup>2</sup>) and  
255 Warning (194.94 mi<sup>2</sup>) areas total 438.94 mi<sup>2</sup> classified as areas for treatment  
256 consideration (Figure 3). Onslow County houses the federal lands of Marine Corps  
257 Base Camp Lejeune, hence a large area of this county was considered protected  
258 (cannot be treated). Robeson County's Approved (682 mi<sup>2</sup>) and Warning (22 mi<sup>2</sup>) areas  
259 total 704 mi<sup>2</sup> classified as areas for treatment consideration (Figure 4).

#### 260 **Creation of Mosquito Control Treatment Zone Maps With Population Density**

261 Figures are also provided showing treatment zones considering human  
262 population density in Brunswick (Figure 5), Columbus (Figure 6), Onslow (Figure 7), and  
263 Robeson (Figure 8) Counties. Here, people/ft<sup>2</sup> is symbolized by colors ranging from

264 white to dark purple. These figures also show the type of classification (i.e., Approved  
265 [green] and Warning [red]) data layer overlaid on the population layer. Population maps  
266 show concentration of the population in coastal (Brunswick County) and  
267 coastal/river/stream (Onslow County) areas, while Columbus and Robeson Counties'  
268 populations are more uniformly spread across the county.

## 269 **DISCUSSION**

270 This study provides information on how maps can be created using GIS as part  
271 of mosquito control preparedness efforts used in a post-hurricane response. The  
272 methodology described here can also be used for normal/routine mosquito control  
273 operations. County and/or state GIS or other personnel can use freely available user-  
274 friendly data sources to customize map layers for use in mosquito control activities. The  
275 NC OneMap resource is shown here, but other states may also have statewide GIS  
276 data initiatives that could be utilized (e.g., Florida Geospatial Open Data Portal:  
277 <https://geodata.floridagio.gov/>, Georgia Geospatial Information Office:  
278 <https://gagiohome-gagio.hub.arcgis.com/>). While some mosquito control programs  
279 already use GIS for mapping mosquito habitat, the workflow steps and detailed protocol  
280 described here are expected to facilitate the planning process of other programs who  
281 may be interested in using this type of system.

282 GIS programs are powerful tools and can streamline mapping and planning  
283 processes for mosquito surveillance and control areas, foci of arbovirus outbreaks, and  
284 human populations that may be at risk [6-8]. Once counties have these maps with  
285 mosquito control treatment acreage delineated, calculations can be made on cost for  
286 aerial and/or ground mosquito control so pre-disaster planning can take place between

287 stakeholders. In many cases and with proper planning, the cost of emergency mosquito  
288 control response can be partially reimbursed by FEMA [3,15]. The protocol developed  
289 here gives local MCPs and other organizations the baseline tools to start working  
290 through FEMA requirements in advance of a disaster.

291 After Hurricane Florence (2018), many NC mosquito control programs were  
292 unprepared to deal with mosquito issues related to flooding (e.g., communication  
293 issues, lack of emergency response plan), hence more information is needed to  
294 improve strategic planning and preparation for these issues that will inevitably occur.  
295 This information can be used for both adulticide and larvicide operations [25]. Flood  
296 plain and other relevant layers can also be included in this mapping protocol.

297 Readily available GIS maps will help state, territorial, tribal, local public health  
298 officials, and associated local MCPs be well-prepared, reduce stress, and improve the  
299 swiftness of any emergency response that may occur. Maps should be updated  
300 approximately every five years or as needed to account for changes in land use,  
301 landscape ecology, and other factors. Further outreach is necessary to counties in  
302 regions where mosquito control response might be needed post-hurricane to improve  
303 planning and preparedness activities, including active communication between relevant  
304 groups in the chain of command [1,3]. Protocols for GIS development can be shared in  
305 advance of a disaster to protect emergency response workers and public health.  
306 Baseline maps shown here can be used to demonstrate to health directors and other  
307 organizations the areas where mosquitoes are likely to occur post-disaster to help with  
308 risk assessments for increased mosquito-human contact. Local authorities such as the

309 health director, county commissioners, and/or MCPs would then determine the areas to  
310 be treated and financial decisions can be made.

311 Studies have shown the need for continued community and financial support for  
312 local MCPs to protect health [26-28]. Ideally, local MCPs would be consistently funded  
313 to support long-term and well-trained personnel experienced in routine and emergency  
314 mosquito control response [27]. Plans should be in place before a disaster occurs to  
315 mount an effective response [3,29]. Strategic planning by developing targeted treatment  
316 areas in advance of a disaster will help MCPs be better prepared to protect public  
317 health.

#### 318 **ACKNOWLEDGEMENTS**

319 The findings and conclusions in this report are those of the authors and do not  
320 necessarily represent the views of the Centers for Disease Control and Prevention.

321

322

## References

- 323 1. Vanderslice R, Porter N, Williams S, Kulungara A. 2020. Chapter 13 - Functional  
324 relationship between public health and mosquito abatement, (Eds: Debboun M,  
325 Nava M, Rueda L) in mosquitoes, communities, and public health in Texas,  
326 Academic Press, pp. 359-379.
- 327 2. Nguyen T, Kelly R, Lobsinger B, Rustin RC. It's best to be prepared: Lessons  
328 learned from the past prepared Georgia for Hurricane Michael. *J Am Mosq Cont*  
329 *Assoc.* 2020; 36: 49-55.
- 330 3. Brown JS, Byrd BD, Connelly CR, Richards SL. Operational insights into  
331 mosquito control disaster response in coastal North Carolina: Experiences with  
332 the Federal Emergency Management Agency after Hurricane Florence. *J Environ*  
333 *Hlth.* 2022;85: 24-31.
- 334 4. Clarke. 2022. Emergency/natural disaster response. Available from:  
335 <https://www.clarke.com/emergency-natural-disaster>
- 336 5. (VDCI) Vector Disease Control International. 2022. Emergency response for  
337 mosquito management: Surveillance and planning. Available from:  
338 <https://www.vdci.net/emergency-response/>
- 339 6. Moore CG, McLean RG, Mitchell CJ, Nasci RS, Tsai TF, Calisher CH, Marfin AA,  
340 Moore PS, Gubler DJ. 1993. Guidelines for arbovirus surveillance programs in  
341 the United States. Division of Vector-Borne Infectious Diseases, National Center  
342 for Infectious Diseases, Centers for Disease Control and Prevention, Fort Collins,  
343 CO. Available from:  
344 [https://www.cdc.gov/ncezid/dvbd/adb/resources/arboguid\\_508.pdf](https://www.cdc.gov/ncezid/dvbd/adb/resources/arboguid_508.pdf)
- 345 7. Chaves LF, Hamer GL, Walker ED, Brown WM, Ruiz MO, Kitron UD. Climatic  
346 variability and landscape heterogeneity impact urban mosquito diversity and  
347 vector abundance and infection. *Ecosph.* 2011; 2:art70.
- 348 8. Sallam MF, Xue RD, Pereira RM, Koehler PG. Ecological niche modeling of  
349 mosquito vectors of West Nile virus in St. John's County, Florida, USA. *Parasit*  
350 *Vectors.* 2016;9: 371.
- 351 9. Amini M, Hanafi-Bojd AA, Asghari S, Chavshin AR. The potential of West Nile  
352 virus transmission regarding the environmental factors using geographic  
353 information system (GIS), West Azerbaijan Province, Iran. *J Arthropod Borne*  
354 *Dis.* 2019;13: 27-38.
- 355 10. Beeman SP, Downs JA, Unnasch TR, Unnasch RS. West Nile Virus and Eastern  
356 Equine Encephalitis Virus High Probability Habitat Identification for the Selection  
357 of Sentinel Chicken Surveillance Sites in Florida. *J Am Mosq Control Assoc.*  
358 2022;38: 1-6.
- 359 11. Boze GV, Markowski DM, Bennett D, Williams MG. Preparations and activities  
360 necessary for aerial mosquito control after hurricanes. *J Am Mosq Cont Assoc.*  
361 2020;36: 90-97.
- 362 12. Nasci RS, Moore CG. Vector-borne disease surveillance and natural disasters.  
363 *Emerg Inf Dis.* 1998; 4: 333-334.
- 364 13. Coalson JE, Anderson EJ, Santos EM, Madera Garcia V, Romine JK,  
365 Dominguez B, Richard DM, Little AC, Hayden MH, Ernst KC. The complex  
366 epidemiological relationship between flooding events and human outbreaks of



- 367 mosquito-borne diseases: A scoping review. *Environ Health Perspect.*  
368 2021;129:96002.
- 369 14. McAllister JC, Madson SL. Federal assistance for mosquito abatement post-  
370 disaster or during disease outbreaks. *J Am Mosq Cont Assoc.* 2020; 36: 74-77.
- 371 15. (FEMA) Federal Emergency Management Agency. 2020. Public Assistance  
372 Program and Policy Guide. Available from:  
373 <https://www.fema.gov/assistance/public/policy-guidance-fact-sheets>
- 374 16. (EPA) Environmental Protection Agency. 2022. Success in mosquito control: An  
375 integrated approach. Available from:  
376 [https://www.epa.gov/mosquitocontrol/success-mosquito-control-integrated-](https://www.epa.gov/mosquitocontrol/success-mosquito-control-integrated-approach)  
377 [approach](https://www.epa.gov/mosquitocontrol/success-mosquito-control-integrated-approach)
- 378 17. Lea CS, Littleton H, Allen AB, Beasley CM. Resilience, self-compassion, and  
379 mental health outcomes: Rebuilding eastern North Carolina after natural  
380 disasters. *NC Med J.* 2020; 81: 315-319.
- 381 18. NC OneMap / State of North Carolina. 2022. NC OneMap: Addresses NC.  
382 Available from: <https://www.nconemap.gov/pages/addresses>
- 383 19. (ESRI). Environmental Systems Research Institute. 2022. Demographics.  
384 Available from: [https://www.arcgis.com/home/user.html?user=esri\\_demographics](https://www.arcgis.com/home/user.html?user=esri_demographics)
- 385 20. (REST) Representational State Transfer Service. 2022. Available from:  
386 <https://www.fws.gov/wetlandsmapservice/rest/services>
- 387 21. (USFWS) US Fish & Wildlife Service. 2022. Wetlands Data. Available from:  
388 <https://www.fws.gov/node/264587>
- 389 22. NC OneMap / State of North Carolina. 2022b. NC OneMap: Stream mapping  
390 program. Available from: <https://www.nconemap.gov/pages/streams>
- 391 23. (NCHP) North Carolina Natural Heritage Program. 2022. Natural Heritage  
392 Program (Natural and Cultural Resources). Available from:  
393 <https://www.ncnhp.org/>
- 394 24. Rey JR, Walton WE, Wolfe RJ, Connelly CR, O'Connell SM, Berg J, Sakolsky-  
395 Hoopes GE, Laderman AD. North American wetlands and mosquito control. *Int J*  
396 *Environ Res Public Health.* 2012; 9: 4537-605.
- 397 25. Johnson BJ, Manby R, Devine GJ. Performance of an aerielly applied liquid  
398 *Bacillus thuringiensis* var. *israelensis* formulation (strain AM65-52) against  
399 mosquitoes in mixed saltmarsh-mangrove systems and fine-scale mapping of  
400 mangrove canopy cover using affordable drone-based imagery. *Pest Manag Sci.*  
401 2020;76: 3822-3831.
- 402 26. Del Rosario KL, Richards SL, Anderson AL, Balanay JA. Current status of  
403 mosquito control programs in North Carolina: The need for cost- effectiveness  
404 analysis. *J Environ Hlth.* 2014; 76: 8-15.
- 405 27. Dye-Braumuller KC, Gordon JR, Johnson D, Morrissey J, McCoy K, Dinglasan  
406 RR, Nolan MS. Needs assessment of southeastern United States vector control  
407 agencies: Capacity improvement is greatly needed to prevent the next vector-  
408 borne disease outbreak. *Trop Med Infect Dis.* 2022;7: 73.
- 409 28. Peper ST, Xue RD, Presley SM. Status of vector control capabilities and  
410 capacities in Florida and Texas, and its potential public health consequences. *J*  
411 *Am Mosq Control Assoc.* 2022;38: 104-108.



412 29. Ward HM, Qualls WA. Integrating vector and nuisance mosquito control for  
413 severe weather response. J Am Mosq Control Assoc. 2020;36: 41-48.

415 **FIGURE LEGENDS**

416

417 Figure 1. Areas in Brunswick County, North Carolina for treatment consideration  
418 classified as approved (green) or warning (red). Maps do not consider human  
419 population density.

420

421 Figure 2. Areas in Columbus County, North Carolina for treatment consideration  
422 classified as approved (green) or warning (red). Maps do not consider human  
423 population density.

424

425 Figure 3. Areas in Onslow County, North Carolina for treatment consideration  
426 classified as approved (green) or warning (red). Maps do not consider human  
427 population density.

428

429 Figure 4. Areas in Robeson County, North Carolina for treatment consideration  
430 classified as approved (green) or warning (red). Maps do not consider human  
431 population density.

432

433 Figure 5. Areas in Brunswick County, North Carolina for treatment consideration  
434 classified as approved (green) or warning (red). The human population layer is included  
435 and people/ft<sup>2</sup> is symbolized by colors ranging from white to dark purple.

436

437 Figure 6. Areas in Columbus County, North Carolina for treatment consideration  
438 classified as approved (green) or warning (red). The human population layer is included  
439 and people/ft<sup>2</sup> is symbolized by colors ranging from white to dark purple.

440

441 Figure 7. Areas in Onslow County, North Carolina for treatment consideration  
442 classified as approved (green) or warning (red). The human population layer is included  
443 and people/ft<sup>2</sup> is symbolized by colors ranging from white to dark purple.

444

445 Figure 8. Areas in Robeson County, North Carolina for treatment consideration  
446 classified as approved (green) or warning (red). The human population layer is included  
447 and people/ft<sup>2</sup> is symbolized by colors ranging from white to dark purple.

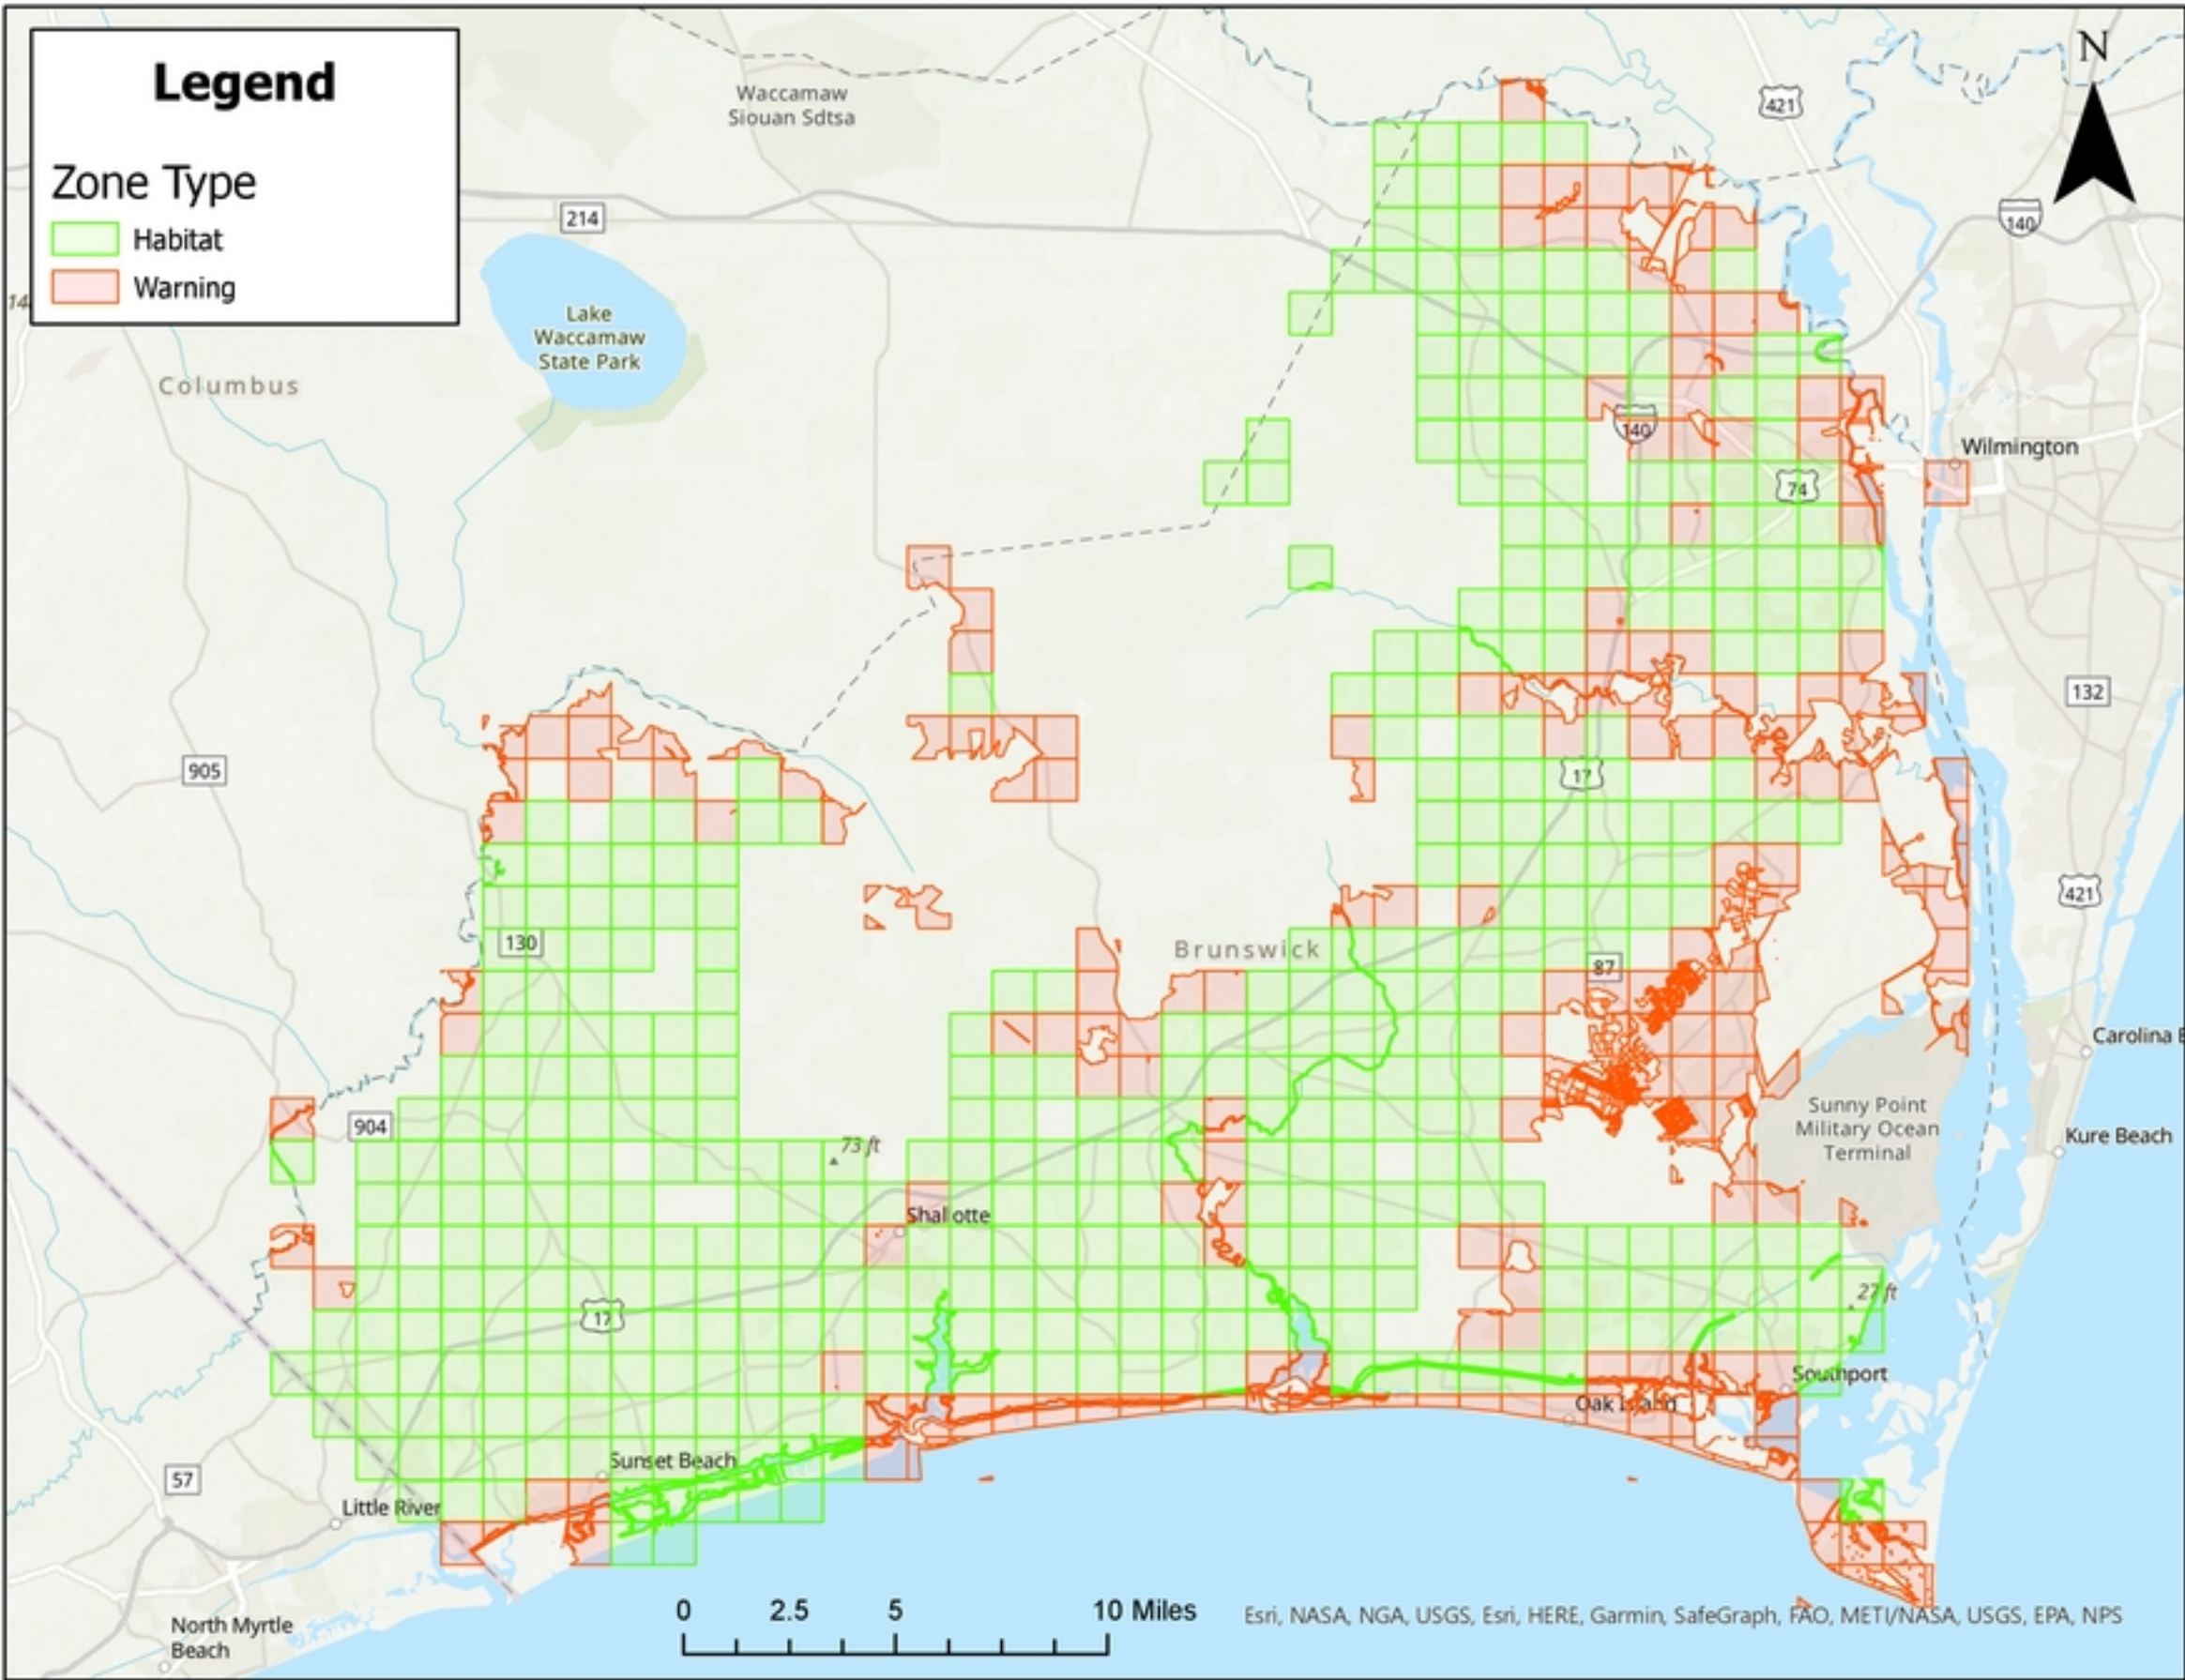

Figure 1



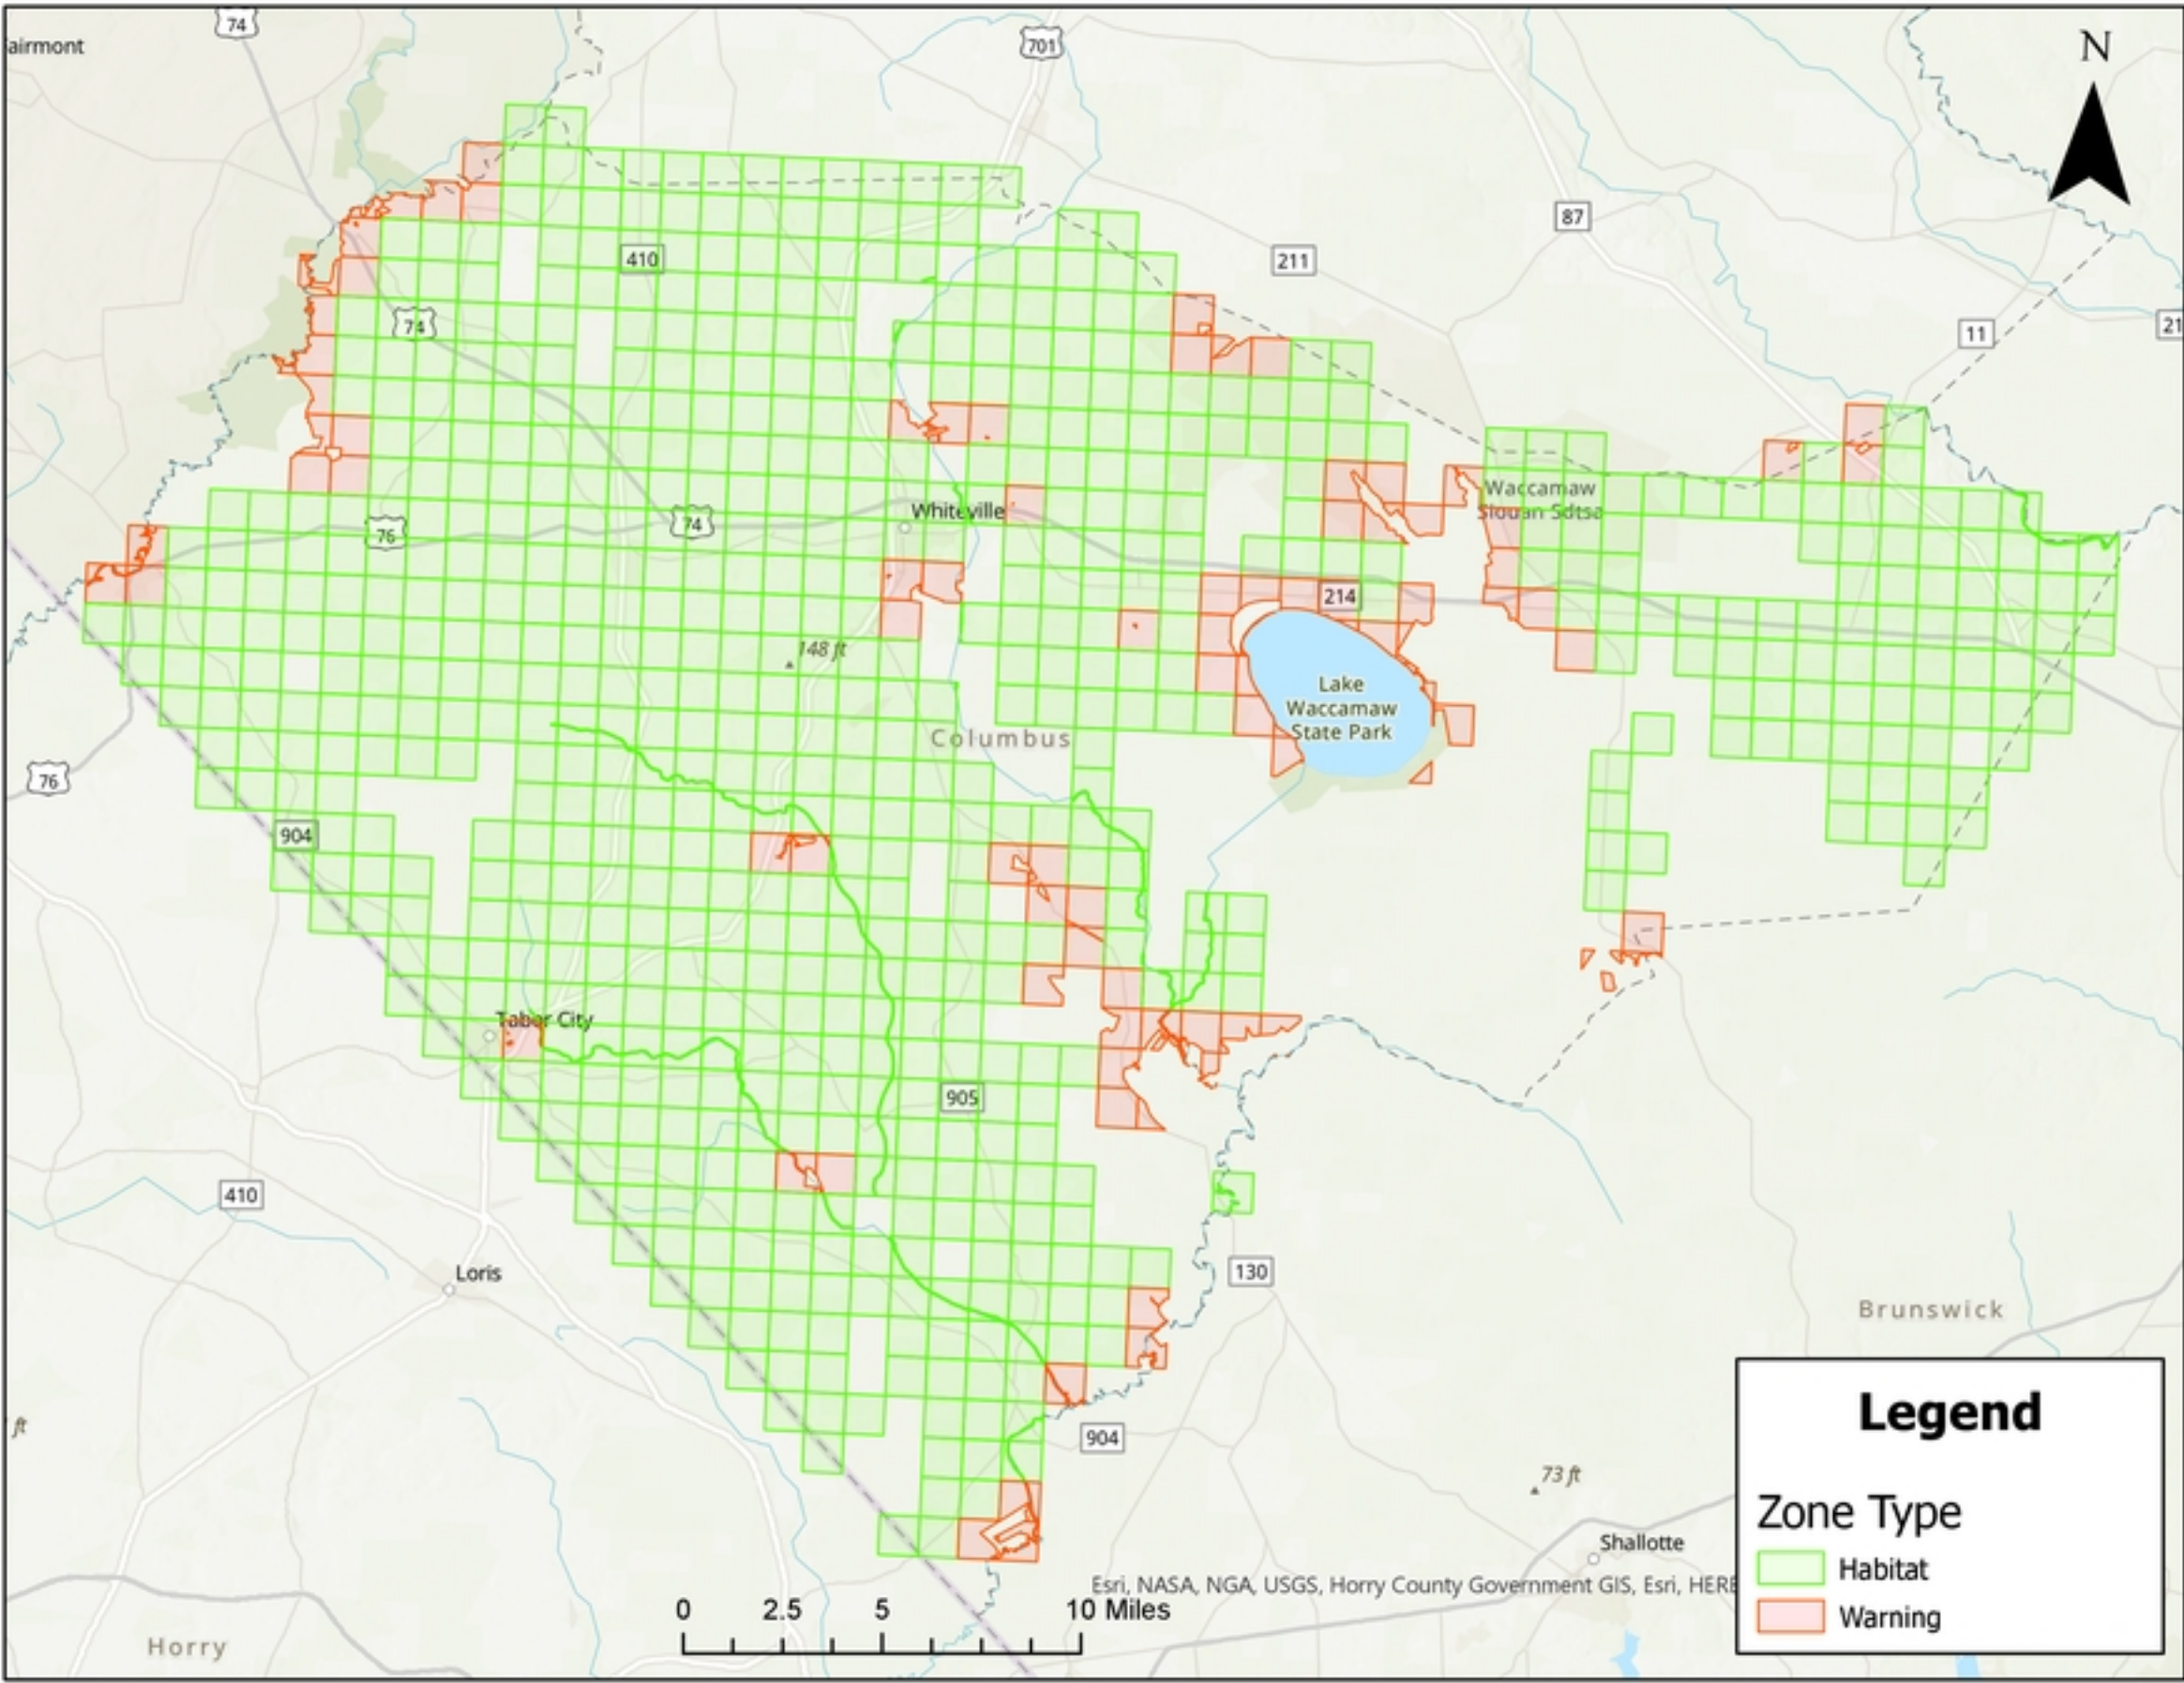

Figure 2



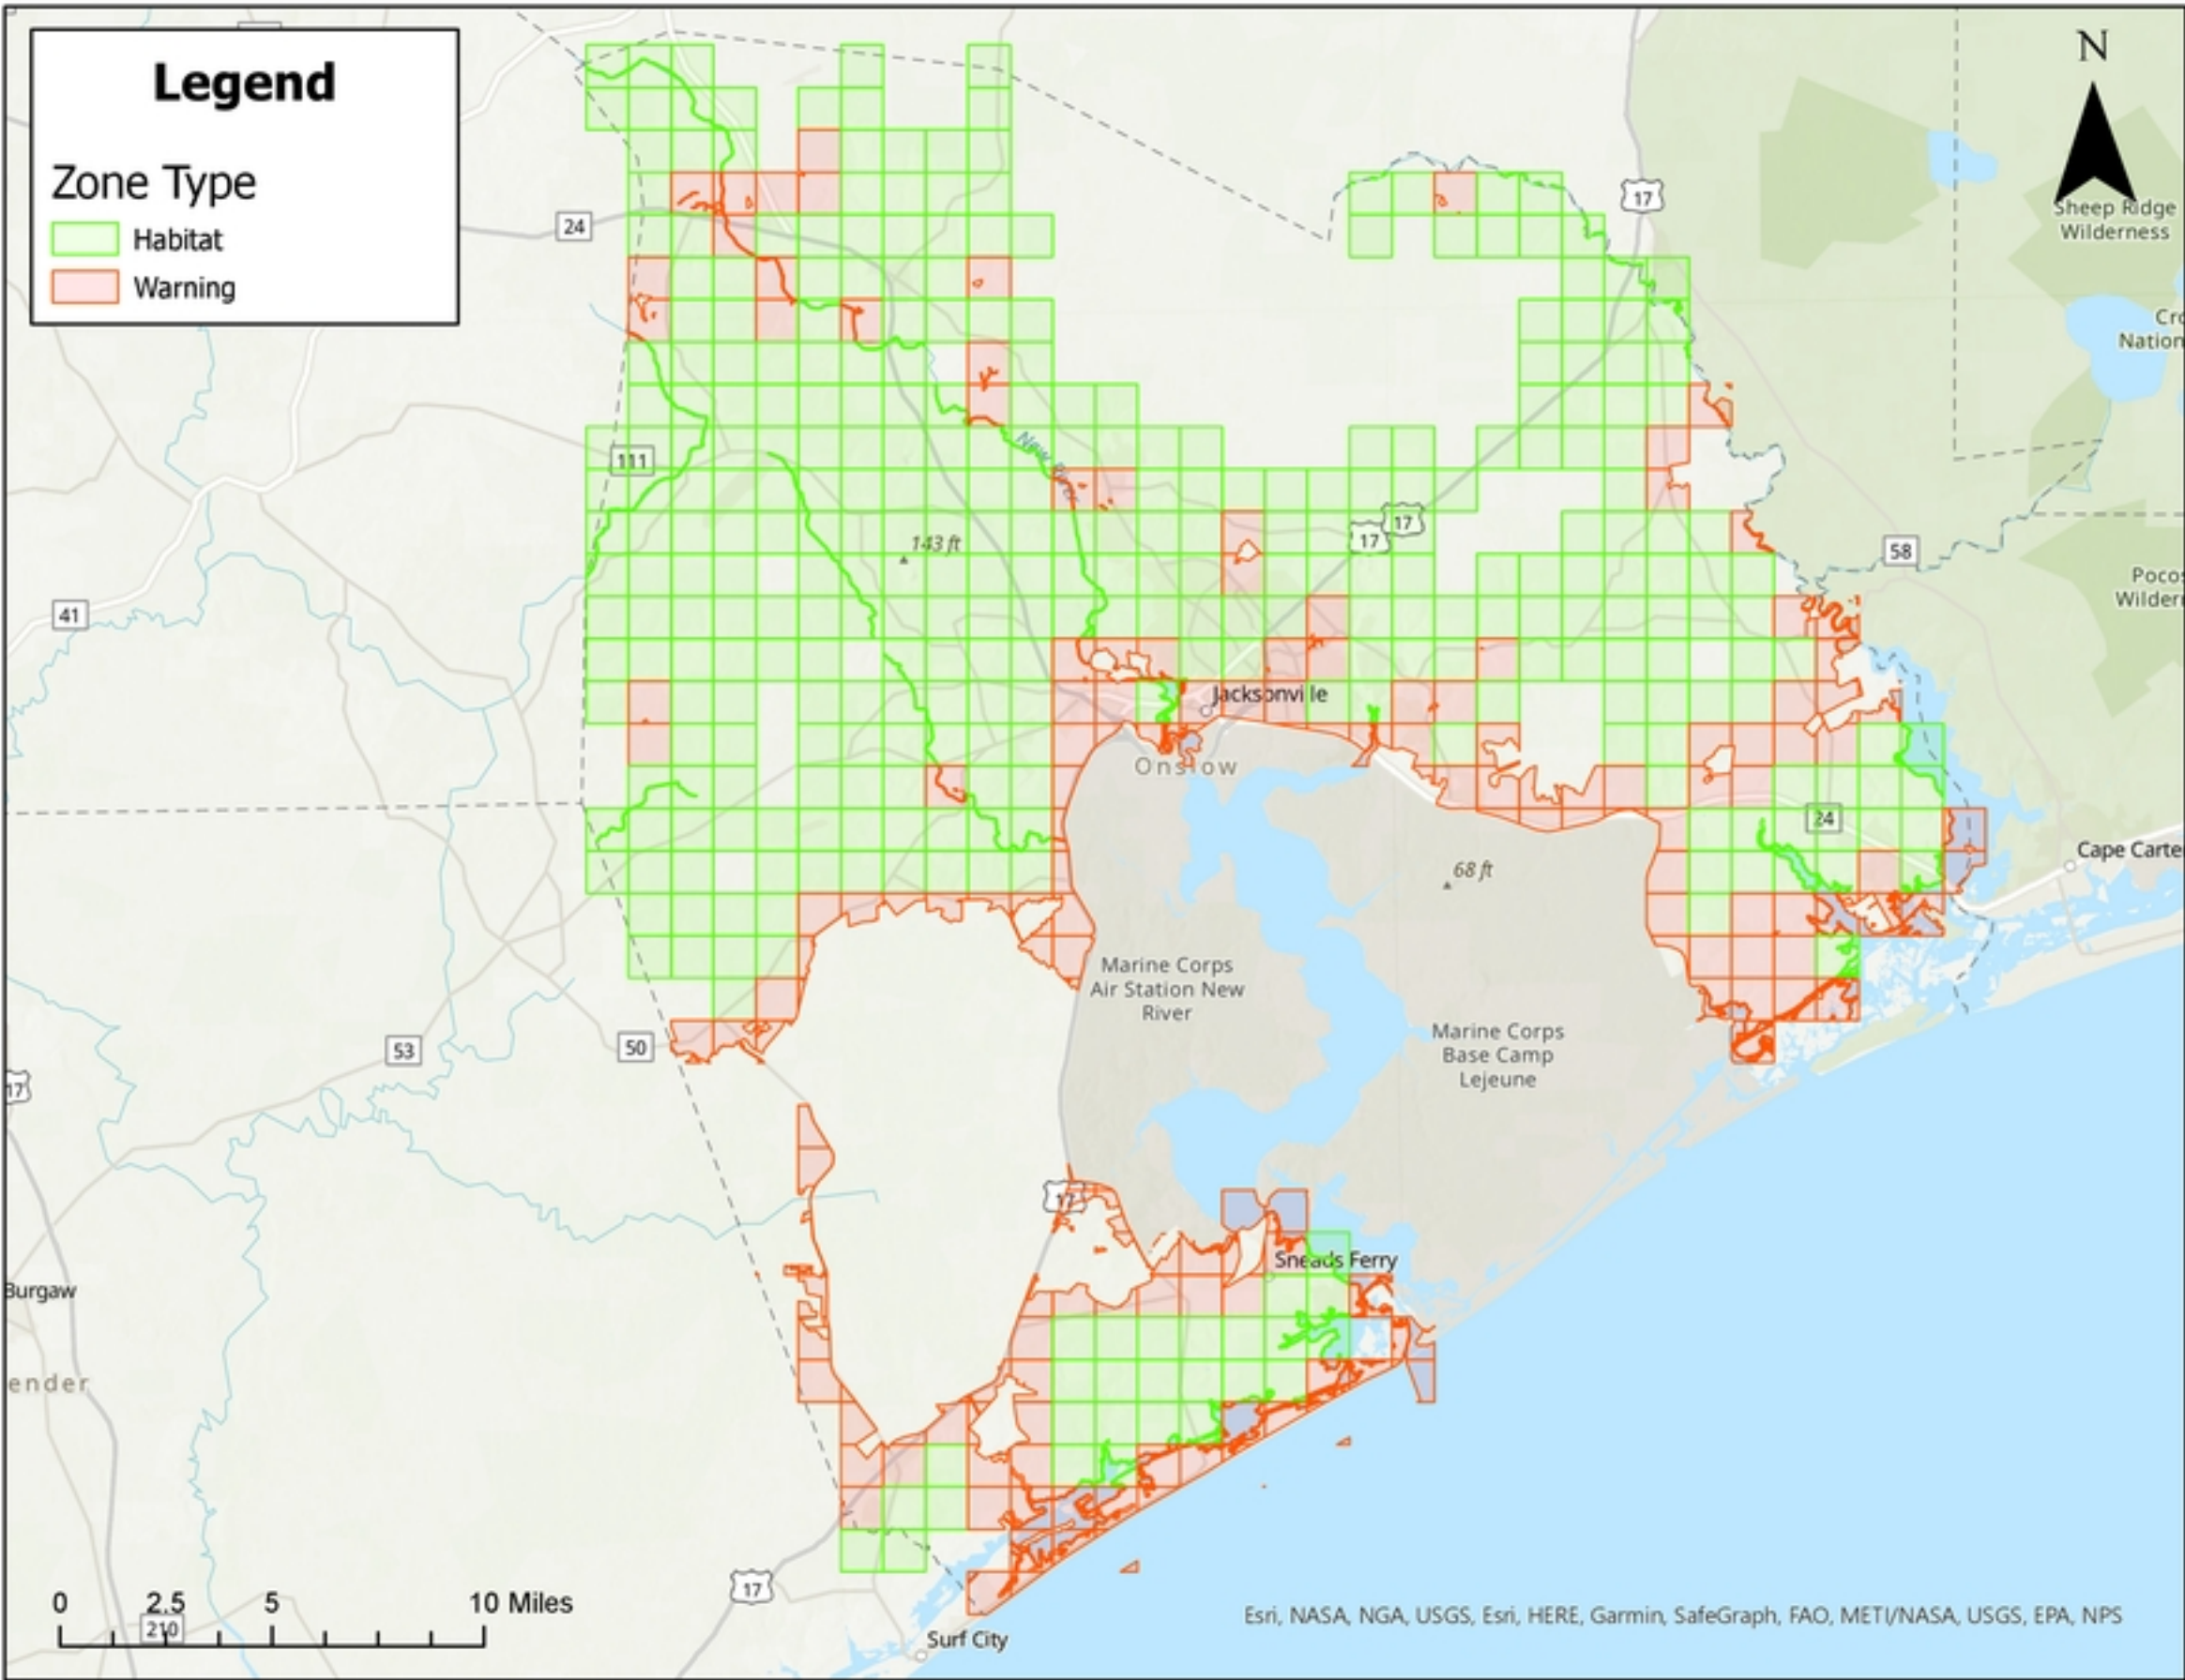

Figure 3



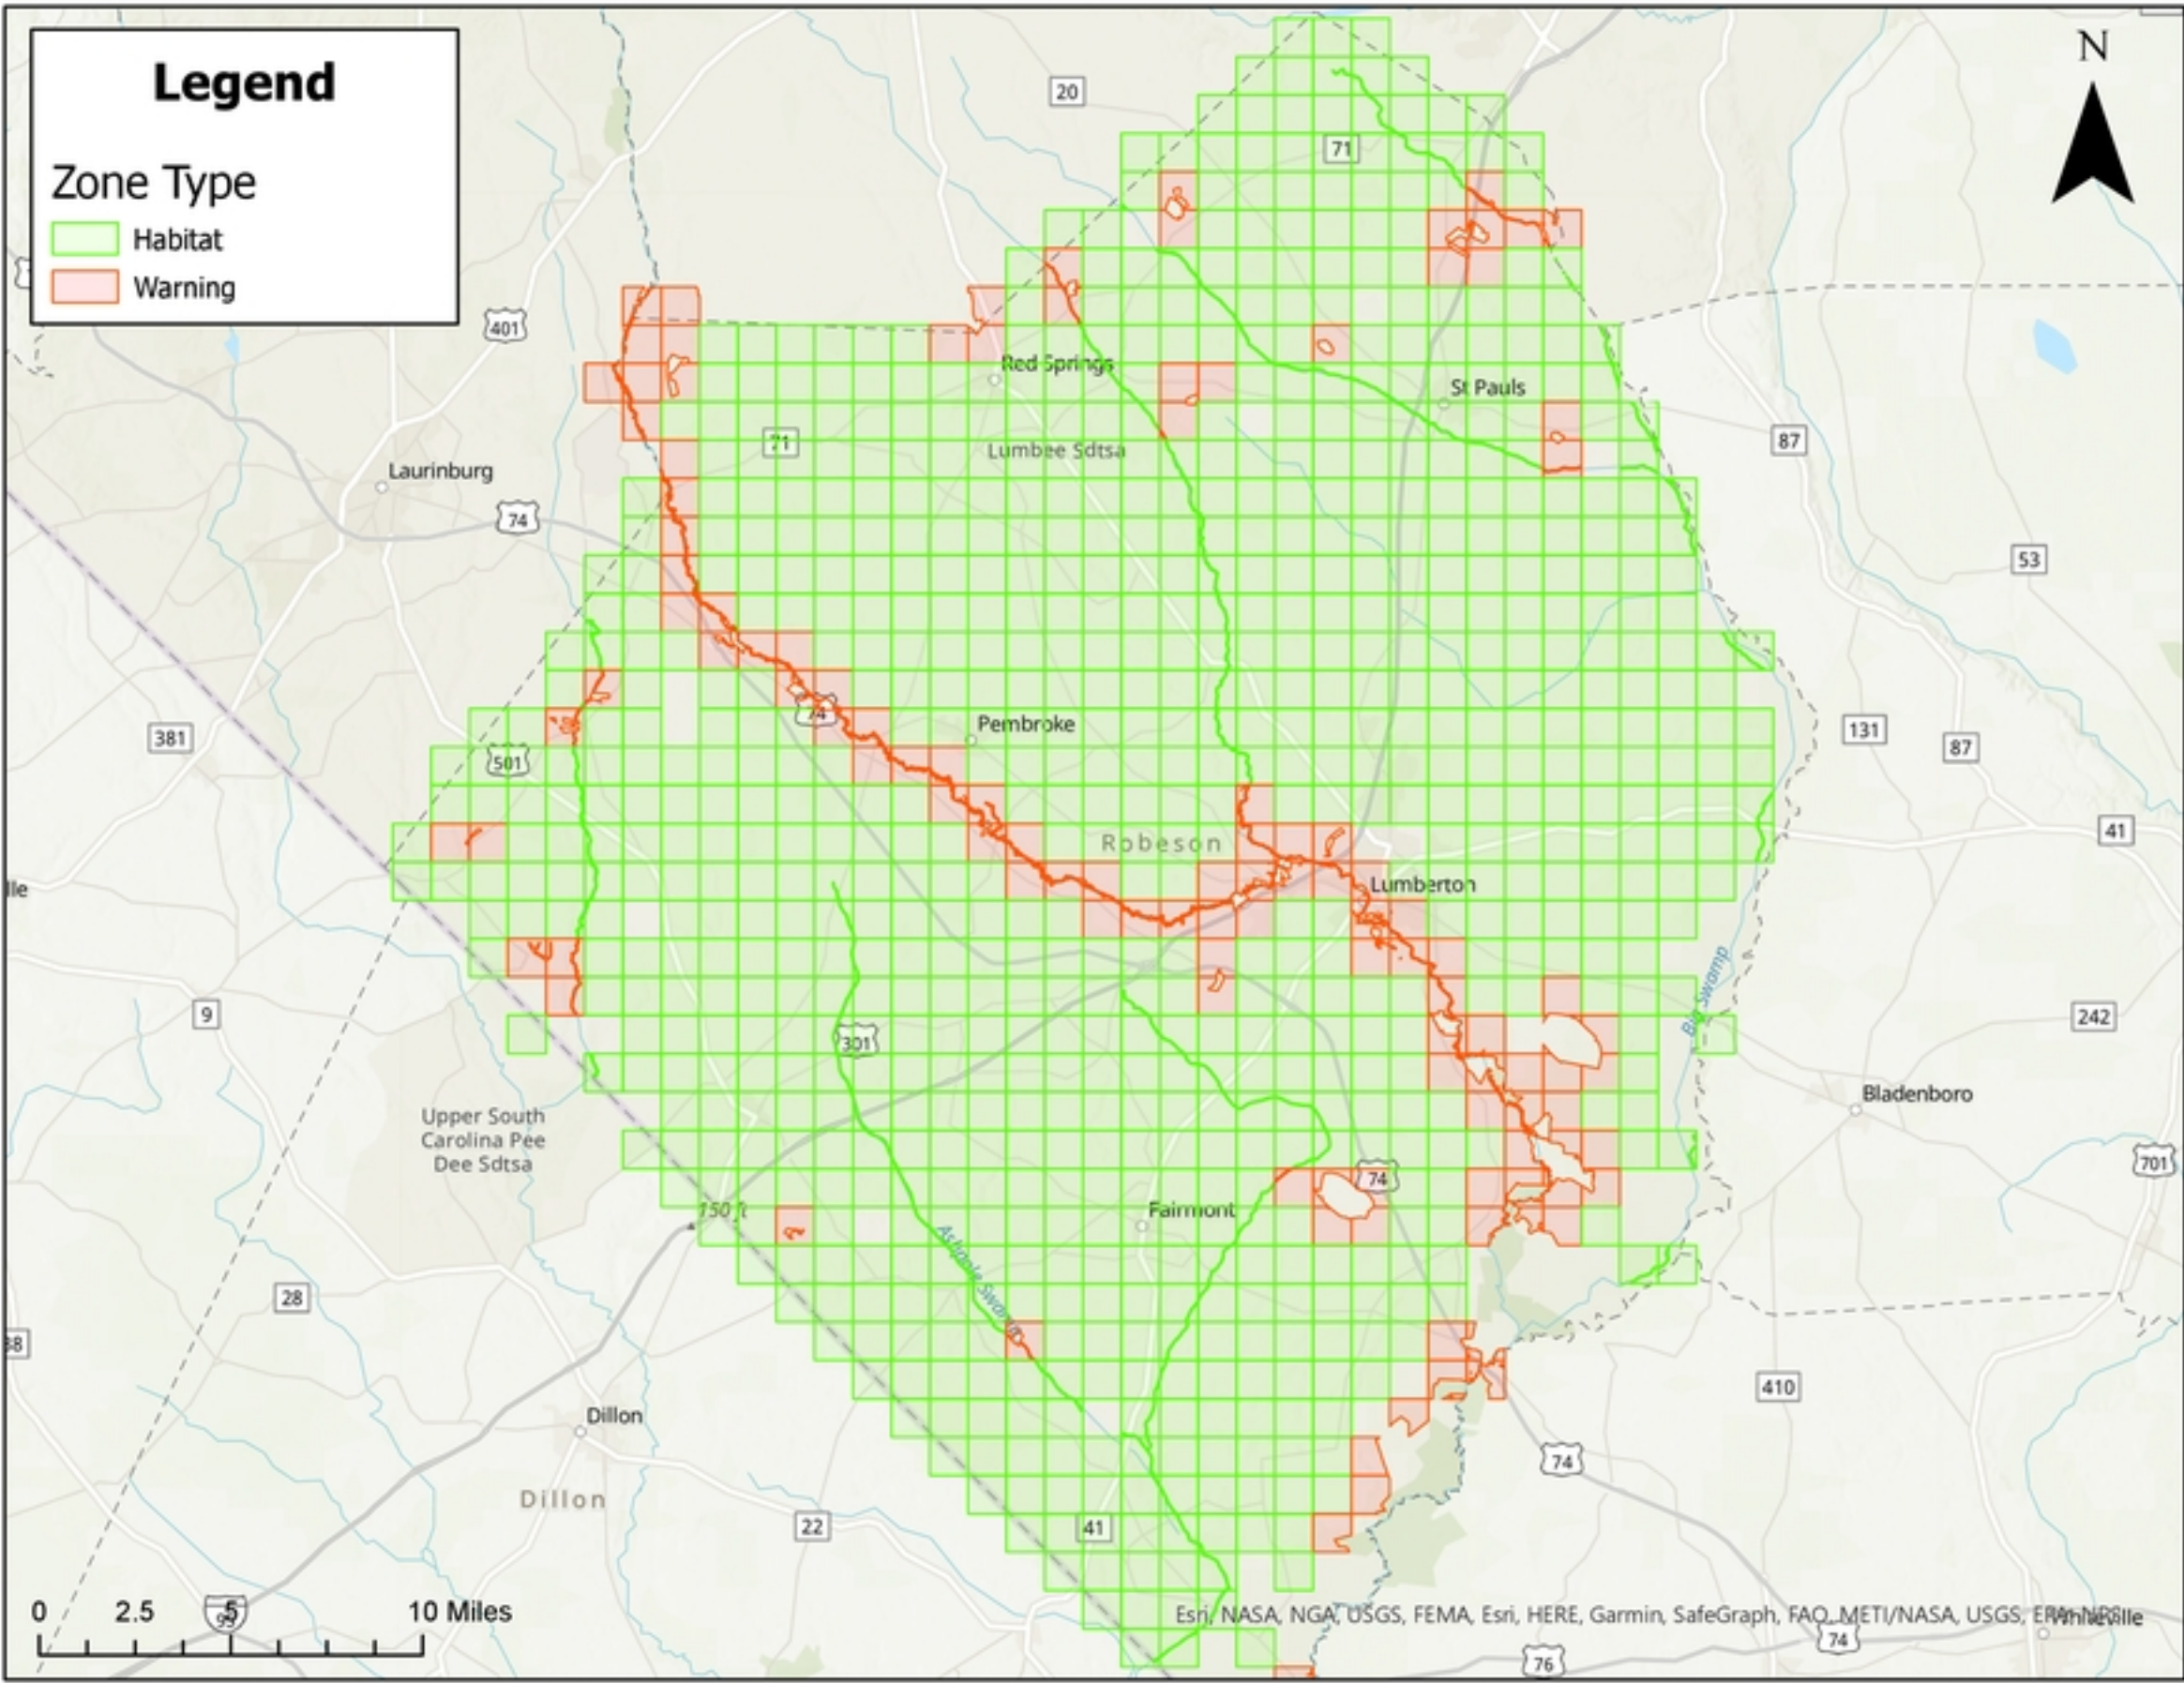

Figure 4



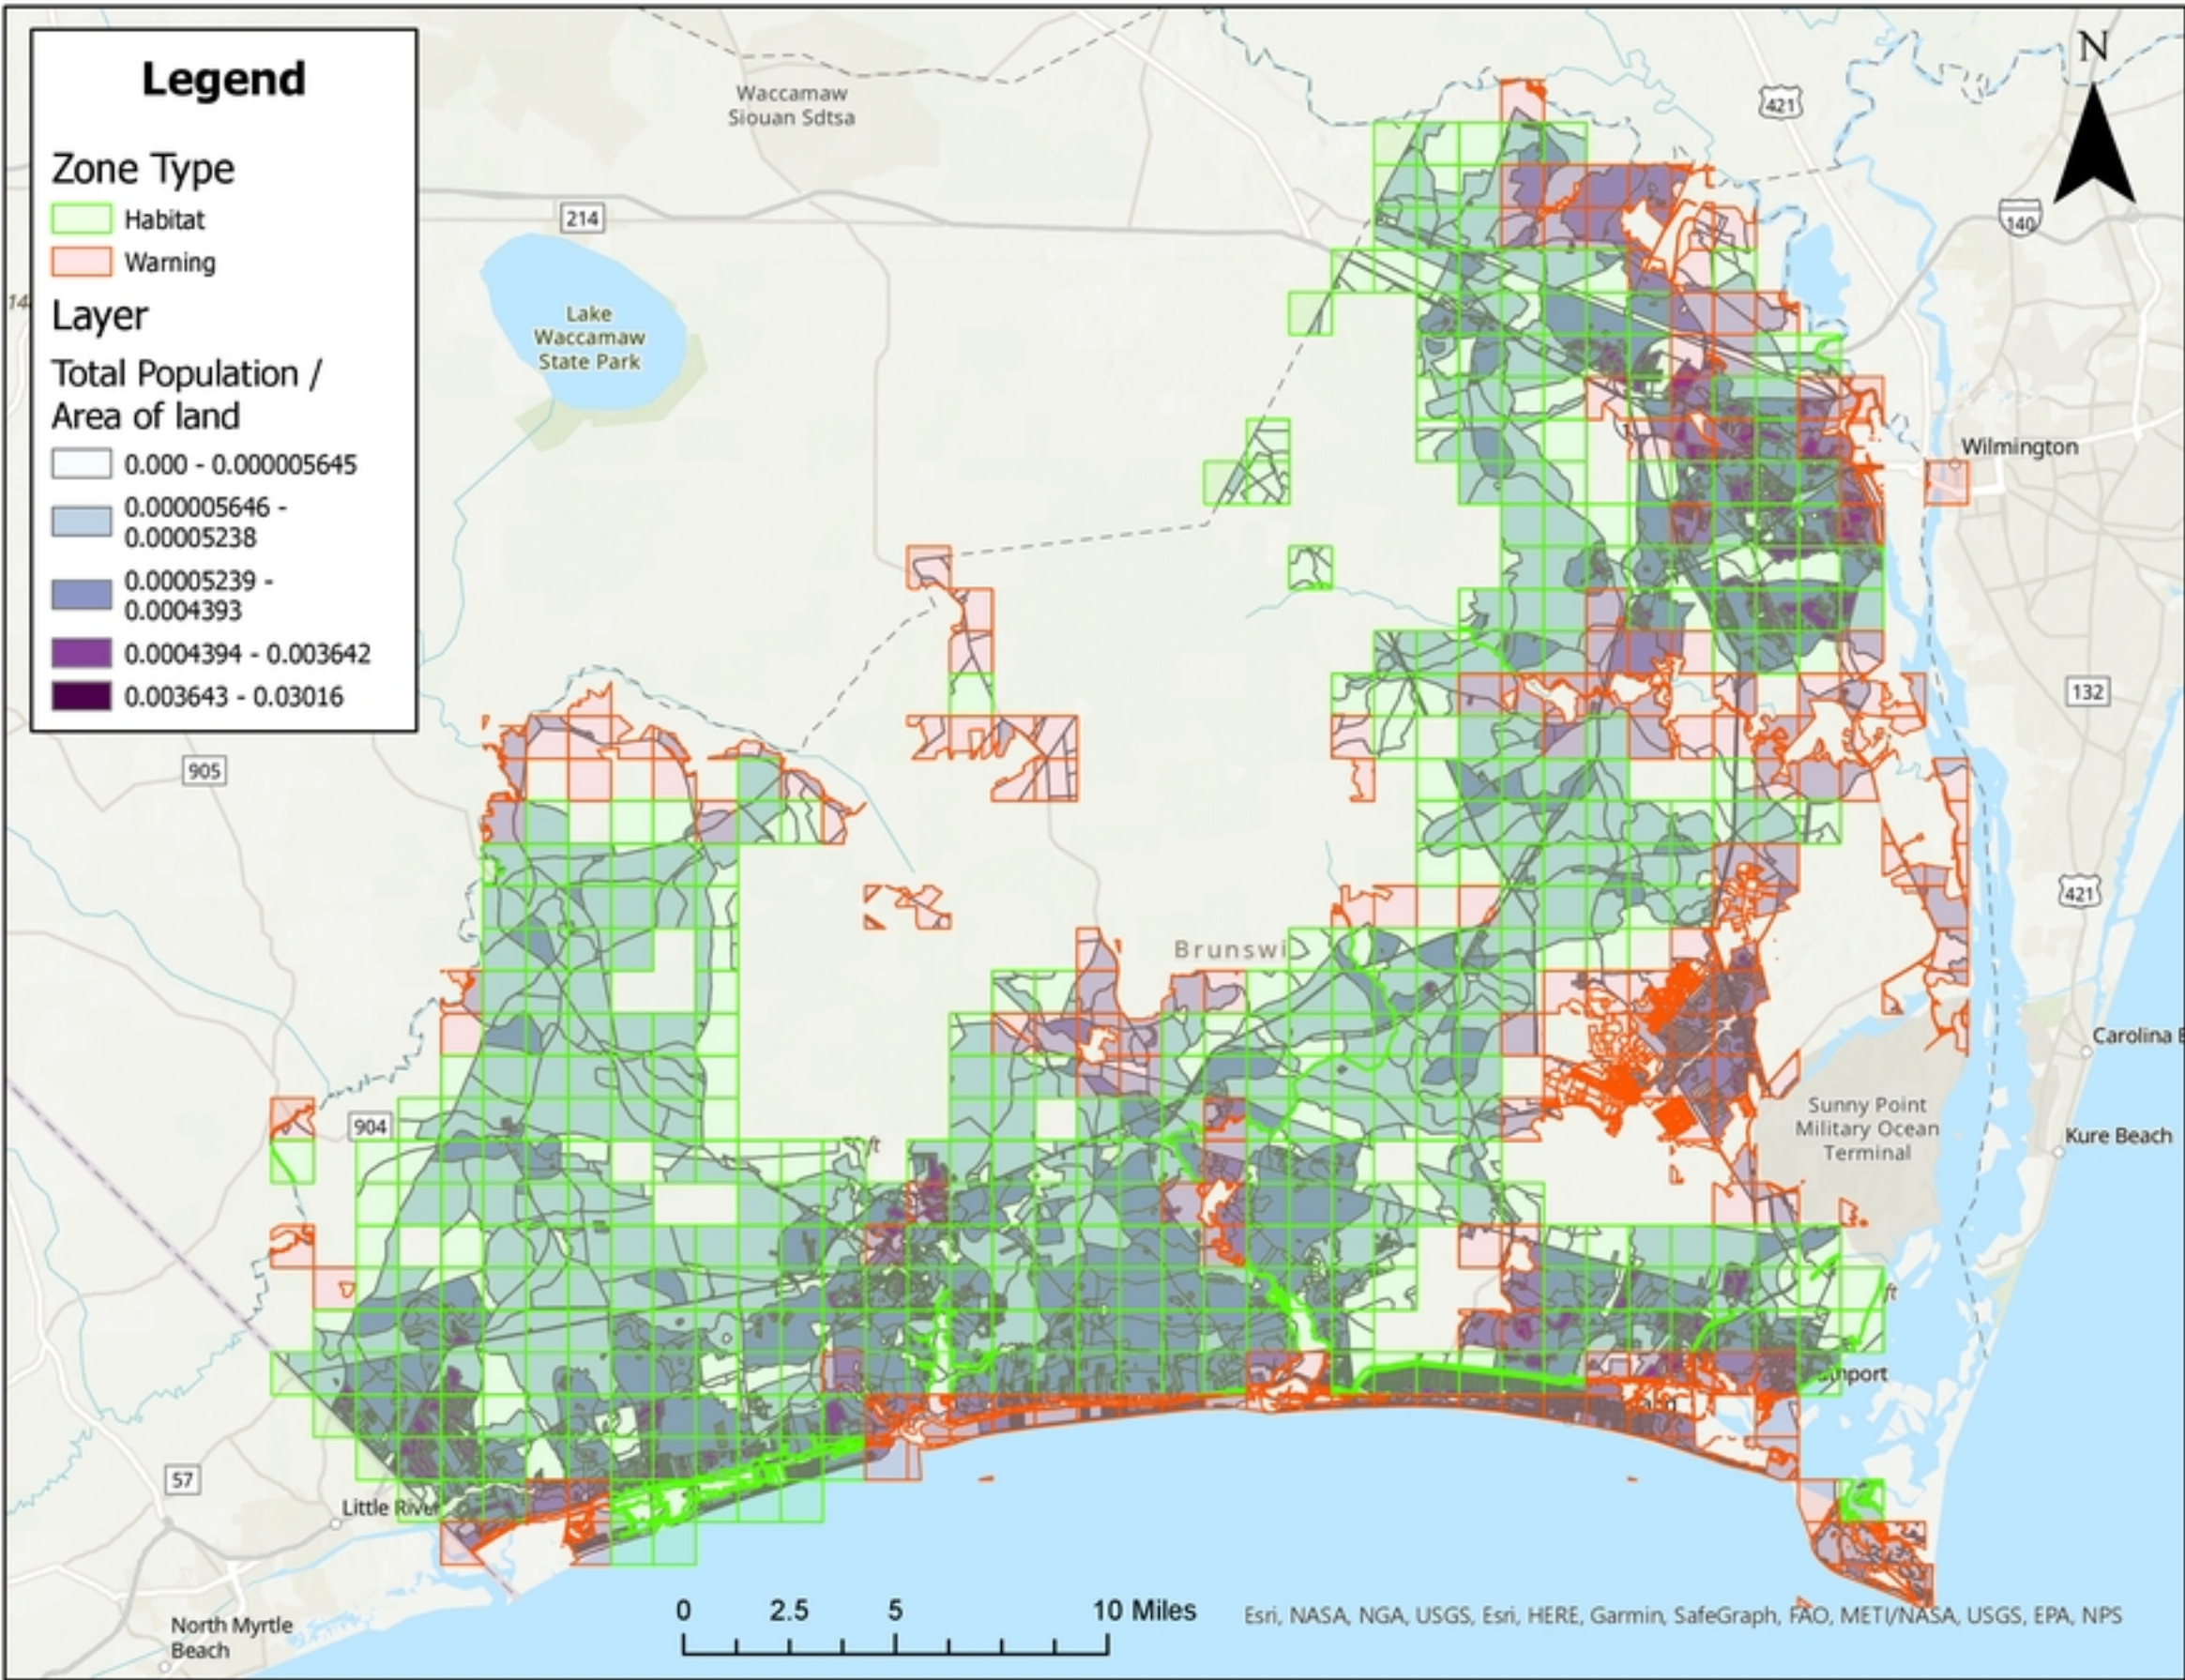

Figure 5



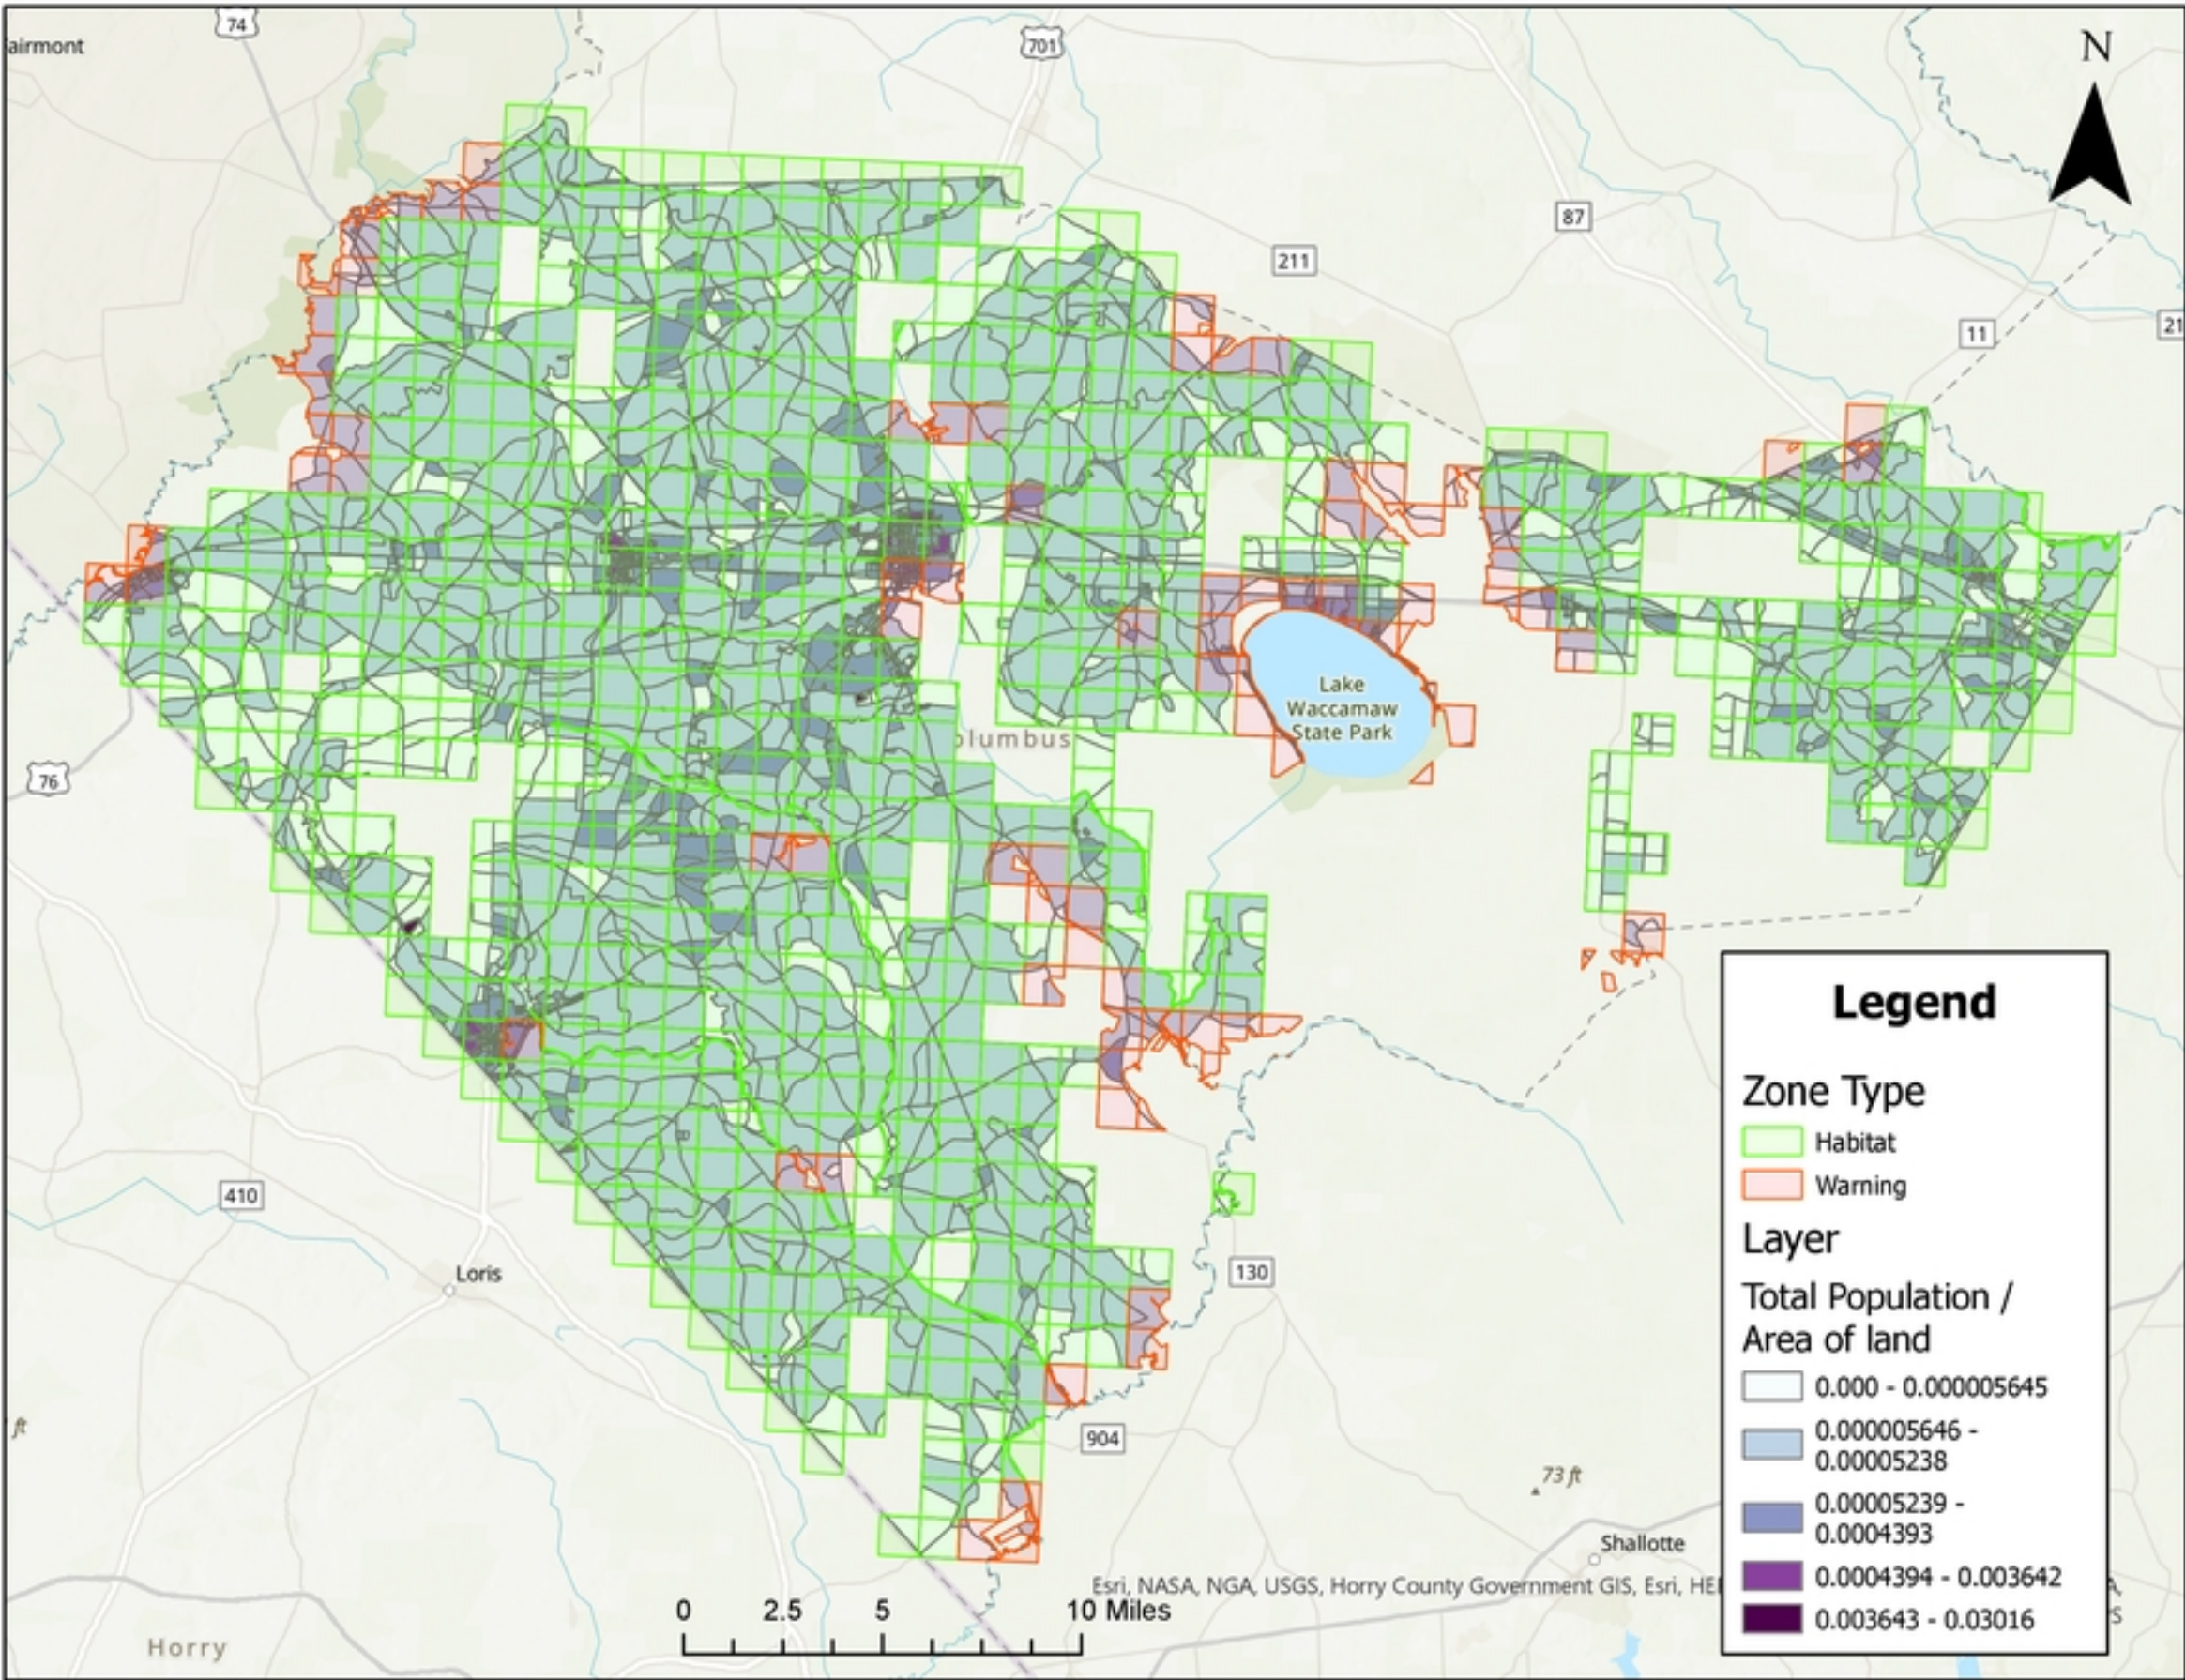

Figure 6



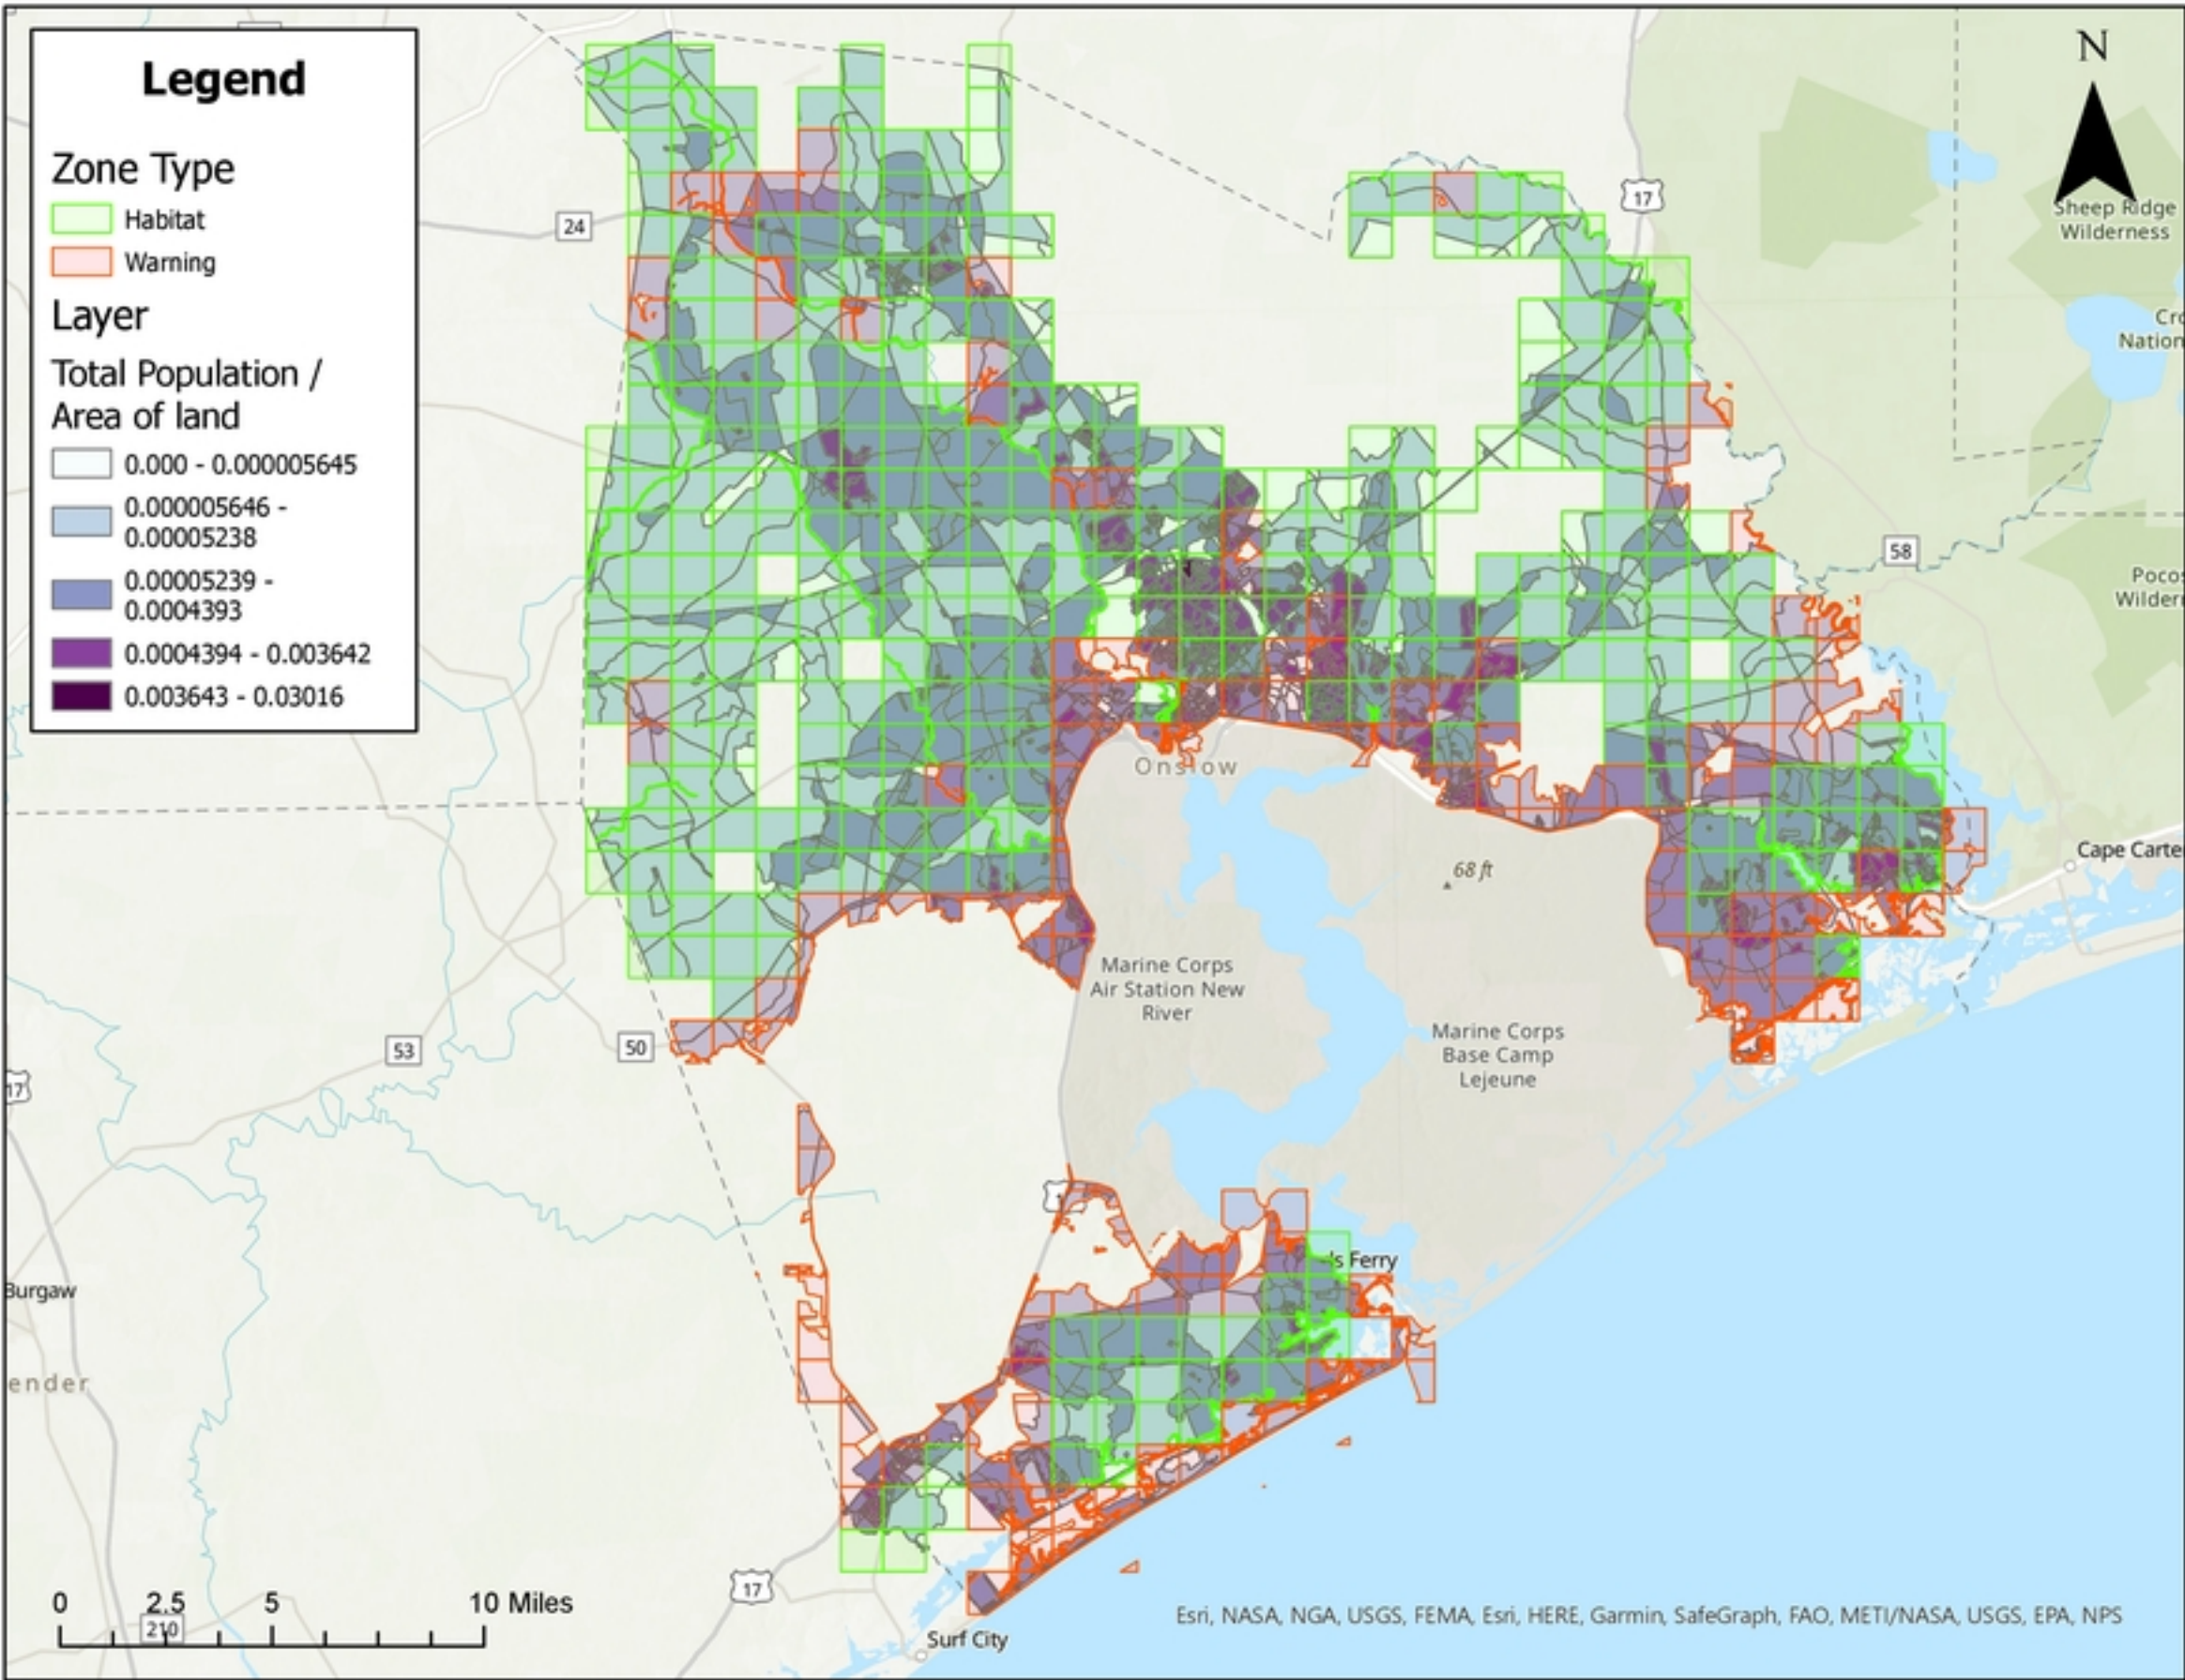

Figure 7



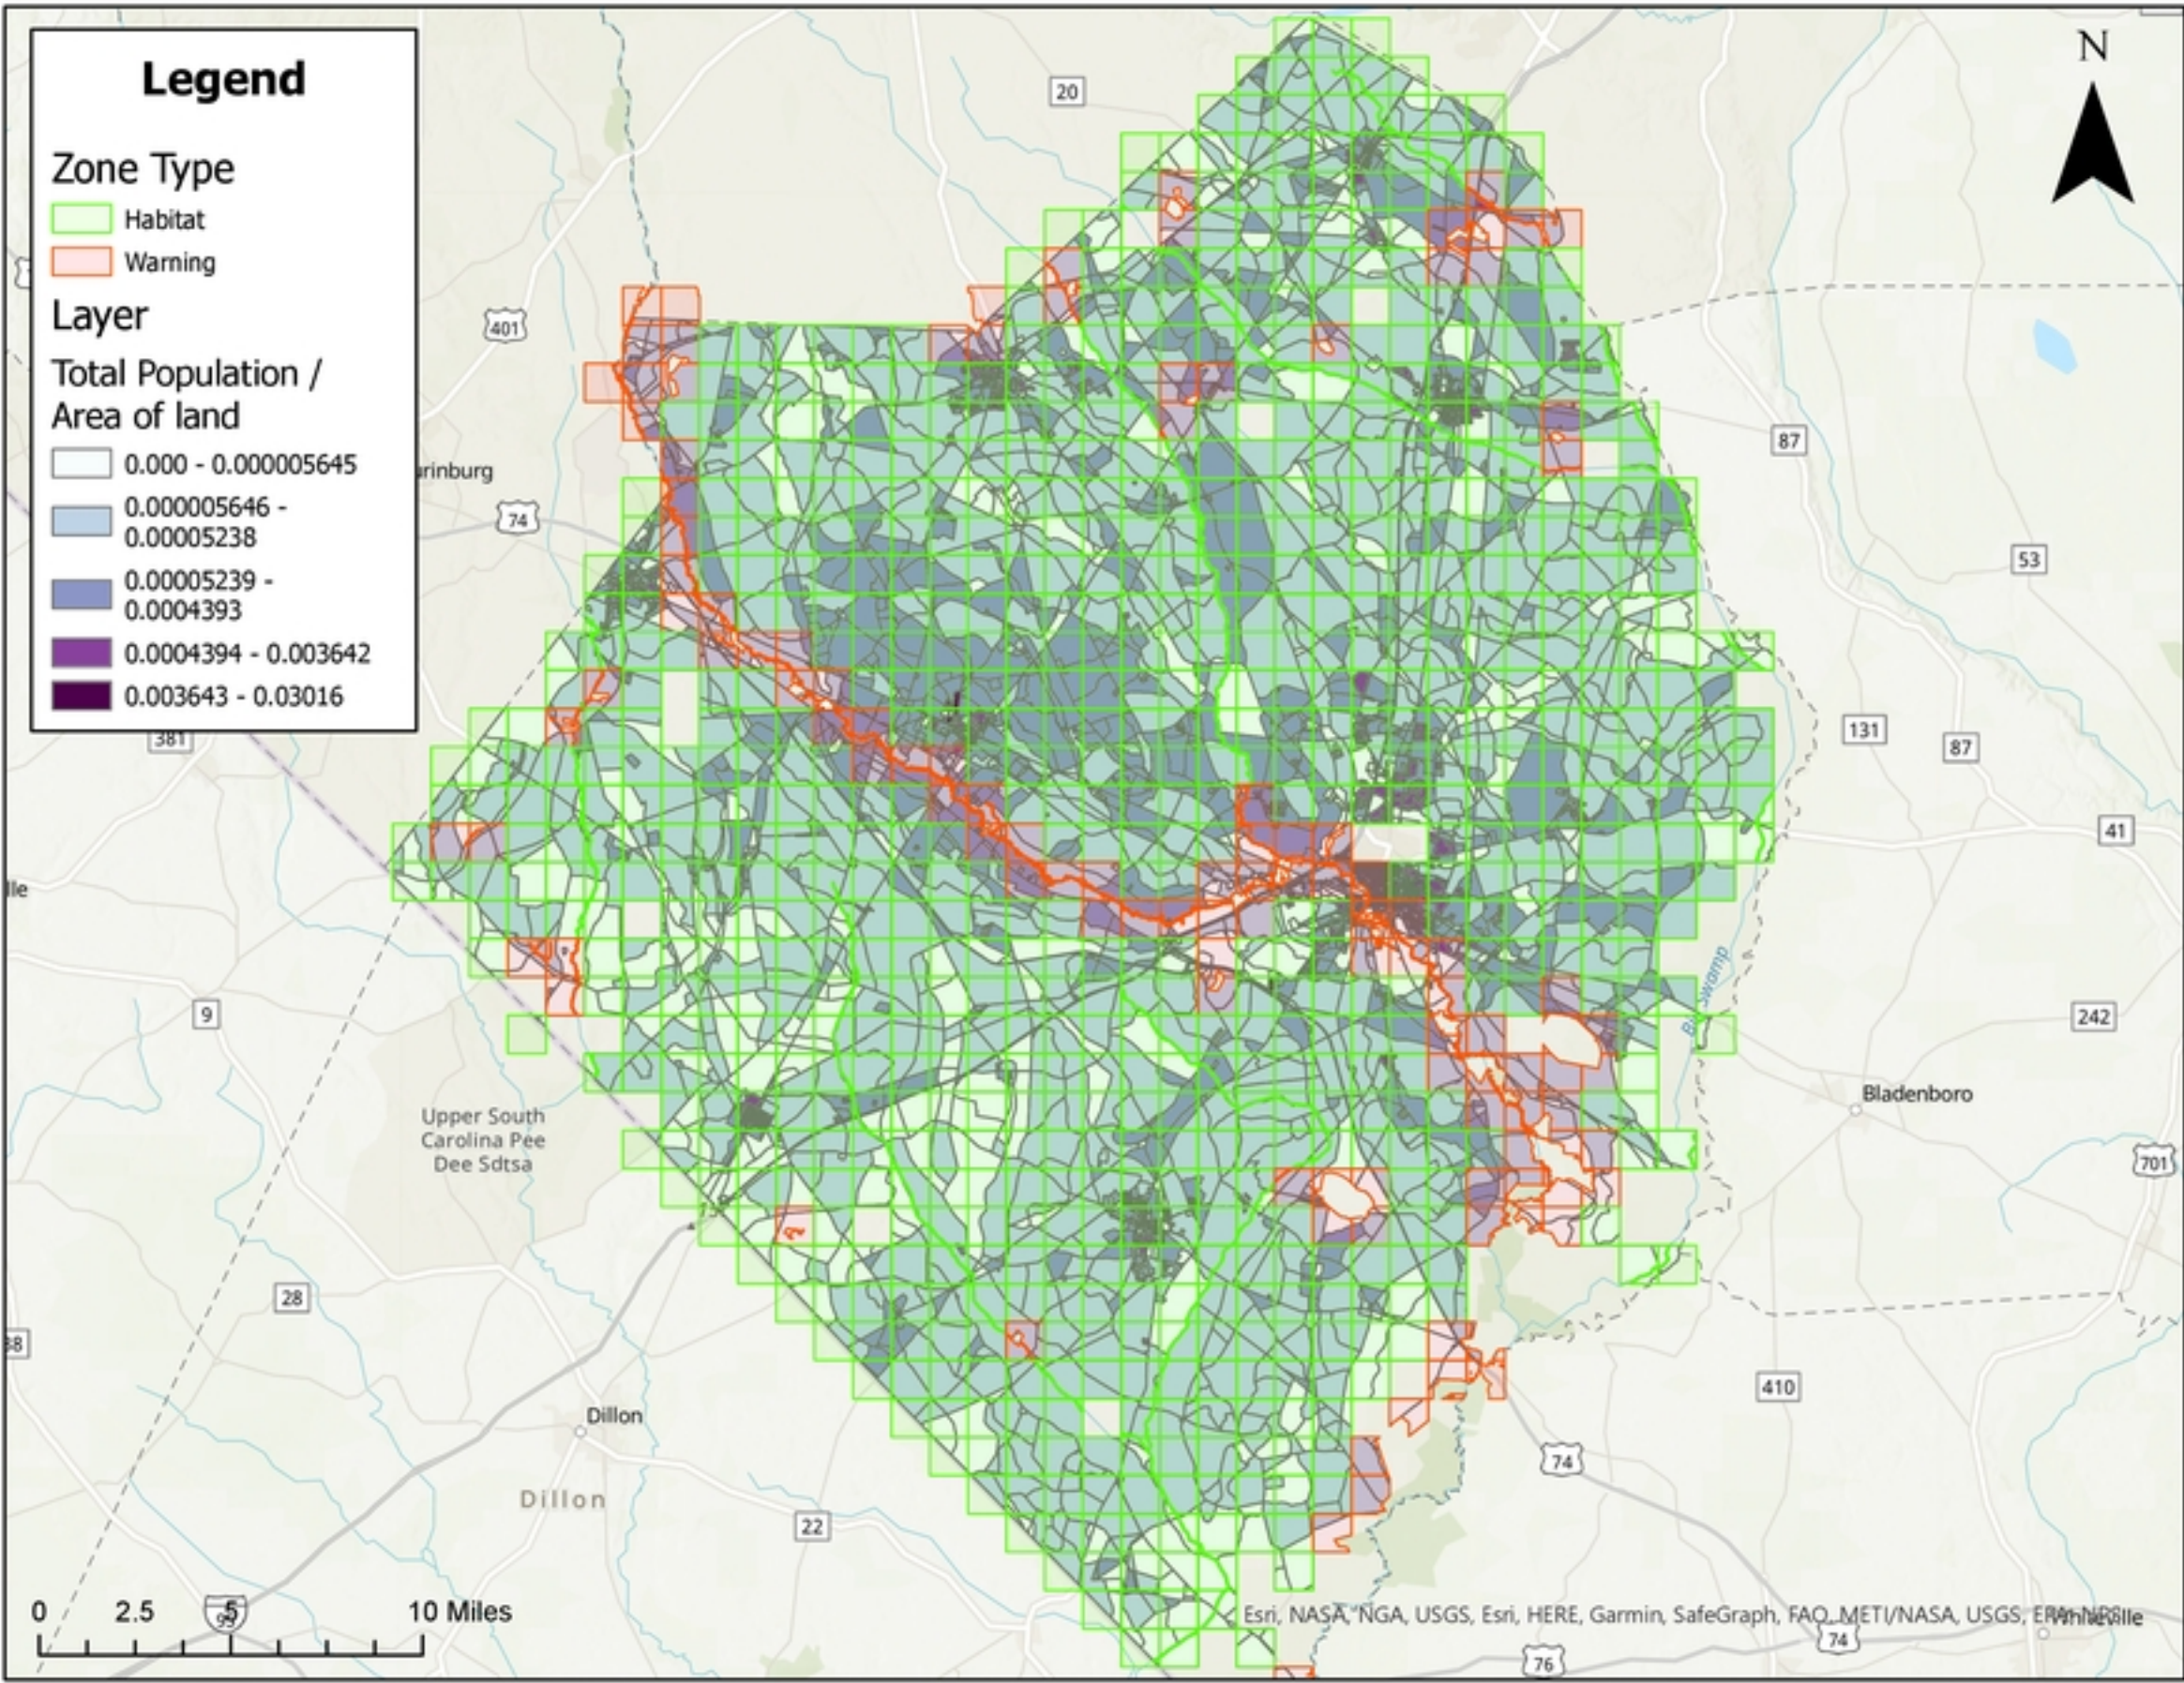

Figure 8
